# Supplementary material for: Regulatory effects of gibberellin and cytokinin on citrus peel cell wall metabolism
Source: Research Square preprint supplement (doi:10.21203/rs.3.rs-6059599/v1), 2025-04-10
Supplement: Supplementary file 1 [file a19e445d7a9efb1ca676a63d.xlsx]

## Sheet: 1
Supplementary material 1: Primers for RT-qPCR
gene ID	Gene symbol	Forward primer (5’-3’)	Reverse primer (5’-3’)
MSYJ157370	CESA1	CCAGAAGATTGACTACTTGAAG	GGCATTGATACGCACCTT
MSYJ081430	CESA2	CGGCTATCACTCAGGTATG	GCAAGGATGGACAGAACA
MSYJ162640	CESA3	GATGGCGATGCTGATGAT	CCGAGGAATATGGTTATGAGA
MSYJ123080	SUSY4	AACTACAGTGATGGCAACA	AGCACCAGGAGATACAATG
MSYJ234320	GLU6	ATCTTGCTTCTGCTGGTAG	CTGGAACAATCGCTGGAA
MSYJ266260	BGLU12	GCCAACTCACCAACTTAAC	ATTCTCTGCGTCGTCTTG
MSYJ264530	BGLU40	GTGCTCAATCCTTCTTCATC	GCTTCCTACTCTATTCCTCAT
MSYJ088590	PAL1	TCTCGCTCTTGTCAATGG	CAGGATGGTGCTTCAGTT
MSYJ277940	F5H	CTTGGCTTAACTGGATTGAC	GAGTCGGCATCATCAGAG
MSYJ193130	CCR1	TGATGTGGTAGTTGATGAGAC	GTTAAGTGTTGGCTGTAAGAG
MSYJ138750	CSE	CCACAGCGAACCATACAG	CGAAGAGGAGACCGTACA
MSYJ259240	HCT	GTTCCATCGGTTGAATACAC	TCAATGAATGGCGGATTACT
MSYJ246140	CCoAOMT1a	GTCTACACAGGCTACTCTC	TGGTTCTTCTCATCTTGGAT
MSYJ182600	CCoAOMT1b	CCTGCTCTTCCTCTTCTTG	TTGTCGTAGCCAATCACTC
MSYJ205790	Actin	ATCTGCTGGAAGGTGCTGAG	CCAAGCCCAGCATGAAGATCAA

## Sheet: 2
Supplementary materia 2: Comparison of RT-qPCR and RNA-seq
MSYJ157370	CESA1			MSYJ081430	CESA2			MSYJ162640	CESA3			MSYJ123080	SUSY4			MSYJ266260	BGLU12
	Stage I	Stage II			Stage I	Stage II			Stage I	Stage II			Stage I	Stage II			Stage I	Stage II
RT-qPCR CK	1.00959	7.01273		RT-qPCR CK	1.0041	2.68172		RT-qPCR CK	4.00039	8.6904		RT-qPCR CK	4.16661	8.386		RT-qPCR CK	1.00385	1.37136
RT-qPCR GA	18.4714	19.0802		RT-qPCR GA	3.34215	5.31259		RT-qPCR GA	33.4604	29.0271		RT-qPCR GA	19.5461	21.448		RT-qPCR GA	4.01666	2.47991
RNA-seq CK	16.5496	115.692		RNA-seq CK	20.0648	63.5405		RNA-seq CK	32.9409	86.7558		RNA-seq CK	107.705	184.603		RNA-seq CK	94.4489	95.8296
RNA-seq GA	42.2276	169.14		RNA-seq GA	47.1863	130.725		RNA-seq GA	42.5291	108.19		RNA-seq GA	203.7	215.631		RNA-seq GA	456.617	165.195
MSYJ264530	BGLU40			MSYJ234320	GLU6			MSYJ088590	PAL1			MSYJ182600	CCoAOMT1b			MSYJ277940	F5H
	Stage I	Stage II			Stage I	Stage II			Stage I	Stage II			Stage I	Stage II			Stage I	Stage II
RT-qPCR CK	1.01841	4.10518		RT-qPCR CK	5.38445	8.03665		RT-qPCR CK	27.8864	20.3461		RT-qPCR CK	4.22385	1.9583		RT-qPCR CK	11.6115	20.9654
RT-qPCR GA	3.86184	2.12786		RT-qPCR GA	2.42512	3.19547		RT-qPCR 6-BA	35.9545	24.5053		RT-qPCR 6-BA	4.389	2.77169		RT-qPCR 6-BA	30.2974	21.7857
RNA-seq CK	48.9886	305.268		RNA-seq CK	39.311	76.0517		RNA-seq CK	6.93212	4.23		RNA-seq CK	73.7115	60.7611		RNA-seq CK	2.91918	4.63566
RNA-seq GA	239.924	208.469		RNA-seq GA	5.91582	7.60335		RNA-seq 6-BA	25.3277	3.76936		RNA-seq 6-BA	151.574	83.0954		RNA-seq 6-BA	8.02282	4.73515
MSYJ193130	CCR1			MSYJ138750	CSE			MSYJ259240	HCT			MSYJ246140	CCoAOMT1a
	Stage I	Stage II			Stage I	Stage II			Stage I	Stage II			Stage I	Stage II
RT-qPCR CK	41.274	37.3321		RT-qPCR CK	6.50753	8.53193		RT-qPCR CK	7.03136	9.10126		RT-qPCR CK	18.4363	8.22747
RT-qPCR 6-BA	44.226	34.3943		RT-qPCR 6-BA	1.02145	9.74135		RT-qPCR 6-BA	1.00145	23.4348		RT-qPCR 6-BA	38.9838	12.647
RNA-seq CK	250.769	210.373		RNA-seq CK	77.8832	120.833		RNA-seq CK	39.8859	86.4178		RNA-seq CK	13.3814	14.7489
RNA-seq 6-BA	526.594	139.476		RNA-seq 6-BA	72.1054	121.932		RNA-seq 6-BA	37.6112	122.576		RNA-seq 6-BA	73.4226	20.5305

## Sheet: 3
Supplementary materia 3: The cell wall metabolism genes and the FPKM in transcriptome data.
Biological process	Enzyme	Gene symbol	Gene ID	CK-I FPKM	GA-I FPKM	BA-I FPKM	CK-II FPKM	GA-II FPKM	BA-II FPKM
Pectin HG synthesis	Galacturonosyltransferase	GAUT8	MSYJ251510	42.9396	75.7923	18.5043	202.82	258.262	232.963
		GAUT4	MSYJ189350	121.568	166.452	57.3195	109.249	117.5	137.186
		GAUT7	MSYJ030360	22.634	31.6355	13.1932	43.7124	40.5187	48.6052
Pectin RG synthesis	Rhamnogalacturonan I rhamnosyltransferase	RRT1	MSYJ177490	31.1703	71.6541	19.9241	62.0675	80.9233	72.0675
	GDP-mannose-4,6-dehydratase	MUR1	MSYJ278120	69.9099	74.8454	35.3783	85.385	98.2044	99.9284
	Xylogalacturonan beta-1,3-xylosyltransferase	XGD1	MSYJ034800	207.895	64.4442	161.692	66.0984	43.982	61.2766
	Arabinosyltransferase	ARAD1	MSYJ258730	9.36681	7.35504	12.0934	11.7442	12.3629	12.5174
Hemicellulose synthesis	Xyloglucan glycosyltransferase	CSLC12	MSYJ066190	53.7049	73.786	23.1937	31.6793	49.6803	44.3374
		CSLC4	MSYJ191100	28.4827	24.5673	18.0837	41.6834	36.9044	42.0737
	Xyloglucan 6-xylosyltransferase	XXT1	MSYJ139780	21.1508	51.1065	15.1556	58.0557	78.093	69.1144
		XXT5	MSYJ176220	25.31	55.4081	21.6267	70.2389	83.3027	67.4802
	Xyloglucan galactosyltransferase	MUR3	MSYJ220820	75.6206	114.807	63.5493	88.606	94.6625	91.1568
	Xyloglucan galactosyltransferase	XLT2	MSYJ210150	36.633	64.6878	35.1227	37.2013	26.4067	22.0225
	Fucosyltransferase	MUR2/FUT1	MSYJ176120	8.74586	12.6937	5.57791	15.4532	23.2625	17.0886
Cellulose synthesis	Cellulose synthase	CESA1	MSYJ157370	16.5496	42.2276	29.4062	115.692	169.14	132.154
		CESA2	MSYJ081430	20.0648	47.1863	6.88506	63.5405	130.725	92.1647
		CESA3	MSYJ162640	32.9408	42.529	48.5362	86.7558	108.19	95.1736
	Cellulose synthase-like protein D	CSLD3	MSYJ009150	41.6976	71.2711	21.6826	74.5802	104.801	106.386
Lignin synthesis	Quinate/shikimate p-hydroxycinnamoyltransferase	HCT	MSYJ259240	39.8859	151.658	37.6112	86.4178	106.177	122.576
	p-Coumaroylshikimate 3′-hydroxylase	C3'H	MSYJ035630	11.9156	9.67784	42.271	14.5018	16.7252	12.6131
	Caffeoyl shikimate esterase	CSE	MSYJ138750	77.8833	123.042	72.1054	120.833	145.407	121.932
	Caffeoyl-CoA O-methyltransferase	CCoAOMT1	MSYJ182600	73.7115	139.642	151.574	60.7611	102.692	83.0954
	Ferulate 5-hydroxylase	F5H	MSYJ277940	2.91918	3.6118	8.02282	4.63566	5.70602	4.73515
	4-Coumarate:CoA ligase like	4CLL9	MSYJ092720	21.6911	27.4988	24.374	55.9137	68.6569	50.5052
	Phenylalanine ammonia-lyase	PAL1	MSYJ088590	6.93212	7.01666	25.3277	4.23	5.58068	3.76936
	Cinnamate 4-hydroxylase	C4H	MSYJ099780	48.7175	33.9496	93.2913	23.1893	21.7107	27.2175
	4-Coumarate:CoA ligase	4CL2	MSYJ190620	76.7066	39.316	70.0112	12.442	8.24336	11.3059
	Caffeic acid O-methyltransferase	COMT	Citrus_reticulata_newGene_3326	98.6089	135.331	256.865	18.8286	4.72433	8.87456
	Cinnamoyl-CoA reductase	CCR1	MSYJ193130	250.769	285.805	526.593	210.373	104.288	139.476
	Cinnamyl alcohol dehydrogenase	CAD1	MSYJ245730	247.169	250.518	465.732	292.897	212.076	232.881
Cell wall degradation	Pectinesterase/pectin methyl‐esterase	PME1	MSYJ013200	107.484	141.366	49.6259	190.222	175.234	185.789
		PME3	MSYJ013210	253.906	128.15	134.711	131.979	109.31	129.715
		PME31	MSYJ119780	106.454	71.5799	86.0269	81.5124	80.2205	83.2509
	Polygalacturonase	PG49	MSYJ234260	133.51	83.3585	101.764	76.7055	74.3441	77.5618
		PG52	MSYJ199660	43.1979	139.706	26.9645	102.538	116.578	126.845
	Pectate lyase	PL18	MSYJ093110	182.469	15.7751	103.932	70.344	3.68921	24.8511
		PL1	MSYJ214460	39.3574	21.0211	73.7548	53.2079	3.06067	13.8433
	β-Galactosidase	GAL2	MSYJ002130	305.227	134.117	700.304	96.211	33.9324	60.5686
	Arabinosyltransferase	ASD1	MSYJ035270	36.5355	28.349	31.5824	34.1052	22.7228	32.5987
	Endotransglucosylase/hydrolase	XTH23	MSYJ190740	364.008	849.995	108.357	246.219	548.466	371.175
	Expansin	EXPA1	MSYJ176010	818	248.252	768.559	753.023	130.831	468.413
		EXPA8	MSYJ145170	1143.02	82.4075	482.322	396.748	63.6742	237.704

## Sheet: 4
Supplementary materia 4: The GA/CTK synthesis/signal pathway-related genes and the FPKM in transcriptome data.
Biological process	Enzyme	Gene symbol	Gene ID	CK-I FPKM	GA-I FPKM	BA-I FPKM	CK-II FPKM	GA-II FPKM	BA-II FPKM
GA synthesis	Kaurenoic acid monooxygenase	KAO	MSYJ153100	1.50979	1.65869	1.71316	3.83126	6.89214	7.81151
	Gibberellin 20 oxidase	GA20ox2	MSYJ055320	3.63303	1.11831	1.62936	0.56369	0.429003	1.88964
	Gibberellin 2 oxidase	GA2ox1	MSYJ224690	5.65602	101.932	31.7105	61.7795	95.7355	29.2716
GA signal transduction	GA insensitive dwarf 1 B	GID1B	MSYJ217930	85.9188	23.7161	158.942	93.7027	22.601	48.37
	GA insensitive dwarf 1 C	GID1C	MSYJ212680	12.7971	3.58958	26.6231	10.3663	6.49946	8.46294
	Gibberellic acid insensitive	GAI	MSYJ135160	10.3488	1.74537	9.90121	8.01676	16.4285	5.3541
	Repressor of GA	RGA	MSYJ036530	11.5809	1.52414	14.8072	3.36111	1.93712	2.24613
	GA insensitive dwarf	GID2	MSYJ258360	17.4614	15.6089	33.6547	27.0976	19.8343	31.7517
CTK synthesis	tRNA dimethylallyltransferase	IPT9	MSYJ285050	14.3138	9.822	15.8367	17.7641	16.0355	18.9826
		IPT2	MSYJ151360	7.57839	7.83658	10.3681	10.1771	19.6379	24.0216
	Cytokinin dehydrogenase	CKX5	MSYJ256060	36.4267	11.9901	32.9323	42.4725	27.5589	43.6539
CTK signal transduction	Histidine kinase	AHK3	MSYJ264200	10.6517	3.38999	25.3025	16.191	9.19056	12.0471
	Histidine-containing phosphotransfer protein	AHP5	MSYJ217970	65.1858	38.7824	42.5122	29.743	28.1273	34.3364
	Two-component response regulator	ARR1	MSYJ140750	27.4415	16.869	48.9515	29.7606	32.0357	30.4989
		ARR17	MSYJ145330	20.7523	20.8092	64.5375	13.9496	9.52754	19.6817

## Sheet: 5
Supplementary materia 5: The cluster 4 and 1 in GA treatment
Cluster 4 (the TFs negatively associated with most cell wall degradation genes were shown)
Gene ID	GAUT8	GAUT4	GAUT7	RRT1	MUR1	XGD1	ARAD1	CSLC12	CSLC4	XXT1	XXT5	MUR3	XLT2	MUR2	CESA1	CESA2	CESA3	CSLD3	HCT	C3'H	CSE	CCoAOMT1	F5H	4CLL9	PAL1	C4H	4CL2	COMT	CCR1	CAD1	PME1	PG52	XTH23	PME3	PME31	PG49	PL18	PL1	GAL2	ASD1	EXPA1	EXPA8	Gene symbol	TF Family	GA(I) vs CK(I)	GA(II) vs CK(II)
MSYJ020920	0.343099	0.739	0.234772	0.0127989	0.314675	0.0106336	0.791327	0.917603	0.731419	0.0918154	0.108808	0.221812	0.822731	0.250951	0.322512	0.27871	0.357774	0.125877	0.144272	0.713493	0.0369486	0.473718	0.262681	0.361921	0.638678	0.135623	0.13403	0.676479	0.61185	0.857403	0.250844	0.0459975	0.51557	0.00837998	0.0437503	0.0329722	0.0107661	0.490389	0.0568594	0.1982	0.215126	0.00550584	NFYB8	NF-YB	↗	↗
MSYJ175630	0.42061	0.635314	0.320691	0.0152031	0.371138	0.0363956	0.89017	0.79536	0.849943	0.128448	0.161171	0.163209	0.74807	0.288875	0.390435	0.310122	0.434297	0.151952	0.0973704	0.79604	0.0566756	0.372435	0.321267	0.439819	0.757714	0.202173	0.200067	0.776069	0.664288	0.78776	0.339119	0.0271366	0.411301	0.0322146	0.0379308	0.0718106	0.00237859	0.422262	0.0974096	0.167088	0.158302	0.000215122	HSFB2B	HSF	↗	↗
MSYJ228270	0.379333	0.746378	0.198339	0.0587333	0.386546	0.0124161	0.819247	0.985476	0.688888	0.141804	0.134797	0.225457	0.756539	0.339278	0.375343	0.379342	0.398834	0.2015	0.151786	0.774403	0.0853569	0.545484	0.321939	0.40063	0.560555	0.131196	0.130688	0.698	0.71705	0.957109	0.209475	0.0474012	0.584053	0.0139197	0.0260282	0.0200154	0.0509017	0.655113	0.0811517	0.323166	0.33298	0.033196	CIGR1	GRAS	↗	↗
MSYJ141490	0.298626	0.78242	0.255557	9.46855e-05	0.247538	0.0282367	0.732196	0.908749	0.729506	0.0591486	0.0908354	0.265758	0.91806	0.17846	0.267617	0.196958	0.308917	0.0734046	0.182296	0.633631	0.0142368	0.466148	0.207598	0.314496	0.671388	0.138453	0.13614	0.626253	0.507421	0.72303	0.27463	0.0810537	0.510913	0.0234527	0.0907838	0.0578508	0.00773959	0.385113	0.0467838	0.122419	0.155713	0.012582	WRKY48	WRKY	↗	↗
Citrus_reticulata_newGene_3806	0.364158	0.699481	0.288968	0.00484657	0.313884	0.0290841	0.819454	0.845298	0.795586	0.0943932	0.126708	0.20571	0.822643	0.23723	0.333546	0.257371	0.376399	0.113944	0.13178	0.723087	0.0343088	0.412002	0.268209	0.381961	0.718095	0.170723	0.16852	0.708532	0.593433	0.758666	0.307739	0.0474446	0.453636	0.0246298	0.0577488	0.0620059	0.00107522	0.403996	0.0714788	0.144379	0.154285	0.00198751	HSFB3	HSF	↗	↗
MSYJ161570	0.3509	0.71818	0.269293	0.00508791	0.306658	0.0222595	0.802815	0.871639	0.770737	0.08886	0.116824	0.214803	0.831564	0.234275	0.323041	0.256447	0.363662	0.112042	0.138819	0.711336	0.0316184	0.433772	0.259673	0.368833	0.690668	0.156382	0.154338	0.691087	0.589746	0.782832	0.287358	0.0487779	0.475833	0.0183899	0.0554875	0.0519168	0.00290071	0.425723	0.063513	0.156177	0.170336	0.00244375	TIFY9	Tify	↗	↗
MSYJ010570	0.157195	0.986219	0.122822	0.0322181	0.141943	0.0236434	0.524945	0.847118	0.503902	0.0133858	0.0177456	0.428941	0.89522	0.11073	0.142796	0.138075	0.167437	0.0409024	0.323483	0.455422	0.00763064	0.687365	0.103804	0.170563	0.45973	0.0426621	0.0412047	0.42514	0.385534	0.824562	0.137498	0.169501	0.737275	0.0219806	0.157187	0.028613	0.0645558	0.508207	0.00192051	0.193368	0.282444	0.0666904		GeBP	↗	↗
MSYJ135800	0.148794	0.929992	0.0680395	0.0685852	0.165138	0.0225316	0.496905	0.747697	0.424972	0.035148	0.0175129	0.466804	0.897637	0.153212	0.149082	0.190728	0.162244	0.0826679	0.3589	0.455643	0.0370196	0.783681	0.118971	0.163269	0.360196	0.0172263	0.0166773	0.394082	0.427572	0.970047	0.0784817	0.188962	0.832617	0.0240543	0.15904	0.0122527	0.10259	0.644269	0.00680027	0.291047	0.387886	0.0958606	HSFA8	HSF	↗	↗
MSYJ230960	0.375001	0.684046	0.337214	0.00557911	0.305272	0.0542714	0.827998	0.794819	0.841377	0.0973766	0.143106	0.211003	0.844357	0.219231	0.335526	0.231964	0.384521	0.102525	0.138977	0.715292	0.0363312	0.373	0.266928	0.391314	0.782456	0.203024	0.200267	0.722671	0.562232	0.664111	0.358319	0.0644069	0.414727	0.0477997	0.0858327	0.0957558	0.00268868	0.327316	0.0877765	0.0987907	0.10722	0.00999966	APC8	C3H	↗	↗
MSYJ004000	0.208401	0.918767	0.223438	0.0127762	0.154278	0.0501214	0.597728	0.993936	0.634609	0.0216421	0.0535696	0.37849	0.92291	0.097524	0.176124	0.111944	0.214946	0.0250103	0.281574	0.495293	0.00204011	0.559006	0.12546	0.220614	0.611623	0.108298	0.105775	0.502773	0.3739	0.65764	0.242944	0.156424	0.607943	0.044616	0.166602	0.0749979	0.038852	0.356188	0.0284712	0.0982421	0.168473	0.0508569		C3H	↗	↗
MSYJ250540	0.172674	0.981057	0.145749	0.0227051	0.148261	0.0244324	0.550331	0.888839	0.540192	0.0141176	0.0250881	0.406265	0.913094	0.109893	0.154022	0.134549	0.182345	0.0367532	0.303415	0.472917	0.00316331	0.648511	0.111387	0.186087	0.498346	0.056733	0.0550295	0.450479	0.390043	0.788618	0.161612	0.157475	0.698084	0.0218943	0.150472	0.034543	0.0523211	0.471881	0.00558572	0.169061	0.251271	0.0563061	NAC017	NAC	↗	↗
MSYJ046180	0.347127	0.726442	0.354667	0.0106238	0.264175	0.0779844	0.781929	0.800646	0.833479	0.084685	0.138824	0.257105	0.918456	0.177003	0.301669	0.183594	0.353535	0.0767614	0.181107	0.6576	0.0326882	0.384128	0.234605	0.361126	0.799451	0.211319	0.208138	0.684234	0.491845	0.580517	0.377388	0.103441	0.427515	0.0699864	0.13193	0.122974	0.0153119	0.268624	0.0906525	0.0611078	0.0827213	0.0293206	MYB44	MYB	↗	↗
MSYJ189770	0.229166	0.889891	0.256073	0.0128045	0.164855	0.0621942	0.623271	0.963594	0.674688	0.03044	0.0696792	0.365431	0.934954	0.10116	0.192242	0.112085	0.234763	0.0274974	0.271738	0.512566	0.006535	0.524228	0.138452	0.241088	0.656698	0.132024	0.12923	0.529897	0.37773	0.615856	0.276771	0.155759	0.572514	0.0556932	0.171987	0.0924658	0.036556	0.319248	0.0417162	0.0781339	0.141891	0.0509945	BHLH35	bHLH	↗	↗
MSYJ264230	0.151158	0.983023	0.152238	0.0290768	0.120312	0.0405552	0.514141	0.874861	0.52644	0.00631913	0.0211923	0.442584	0.860042	0.0829824	0.129628	0.10424	0.158915	0.0215372	0.336557	0.431074	0.00259867	0.665615	0.0889256	0.163028	0.500426	0.0594359	0.0575151	0.419394	0.343095	0.742608	0.168861	0.186718	0.716326	0.0372298	0.183063	0.0517031	0.0643226	0.442576	0.00731306	0.15085	0.243353	0.072256	CAMTA4	CAMTA	↗	↗
MSYJ113340	0.302785	0.944234	0.0947317	0.136618	0.357955	0.0381584	0.672443	0.780556	0.492953	0.156683	0.114868	0.381344	0.878329	0.35148	0.321277	0.404175	0.324294	0.239212	0.294154	0.670148	0.132583	0.775769	0.289843	0.32279	0.360322	0.0766205	0.0774033	0.556184	0.683811	0.776186	0.0993328	0.146951	0.8156	0.0441667	0.0980779	0.0176973	0.145788	0.853381	0.0846119	0.467463	0.518126	0.11968	WRKY23	WRKY	↗	↘
MSYJ235870	0.104004	0.88664	0.129677	0.0568024	0.0791027	0.0649508	0.431052	0.793443	0.455419	0.00019464	0.00986348	0.526961	0.765041	0.0542847	0.0854092	0.0751932	0.110135	0.0132859	0.413381	0.353248	0.0137849	0.748979	0.0529941	0.113759	0.446339	0.0460724	0.0442596	0.343426	0.279089	0.739901	0.145372	0.246933	0.801415	0.0619732	0.239451	0.0694827	0.103293	0.46347	0.00893679	0.169043	0.284865	0.113425	CAMTA3	CAMTA	↗	↗
MSYJ020630	0.0967902	0.864465	0.0943578	0.0662962	0.0886186	0.0540371	0.419373	0.744946	0.41442	0.00461791	0.00268822	0.535311	0.774292	0.0730104	0.0858961	0.0997787	0.104923	0.0291512	0.420212	0.356077	0.0207615	0.79175	0.0572855	0.107461	0.39206	0.0254077	0.0240732	0.328603	0.303099	0.818844	0.107927	0.245242	0.843901	0.0527683	0.228313	0.0508221	0.112932	0.532434	0.00324975	0.214519	0.333196	0.117996	RAP2-7	AP2/ERF-ERF	↗	↗
MSYJ107230	0.1112	0.887397	0.188068	0.0661878	0.0633602	0.104053	0.42732	0.840975	0.500252	0.00596098	0.0312551	0.551532	0.720294	0.0293974	0.0822226	0.0409622	0.113612	0.000696717	0.439215	0.330489	0.0216884	0.71758	0.0474761	0.11866	0.517581	0.0867134	0.0842386	0.34832	0.230178	0.622707	0.206431	0.282205	0.770297	0.0986453	0.287823	0.117921	0.115815	0.373993	0.0327326	0.118637	0.236796	0.134295	HD1	HB-KNOX	↗	↗
MSYJ130250	0.228171	0.898545	0.274338	0.0196111	0.156836	0.0785379	0.614902	0.955219	0.683534	0.0329378	0.0768617	0.382042	0.911474	0.0913092	0.188099	0.0990772	0.232375	0.0236909	0.288191	0.498468	0.011349	0.521918	0.13435	0.239122	0.675904	0.14536	0.142359	0.525159	0.356337	0.577023	0.295816	0.17398	0.570398	0.0712669	0.194203	0.111282	0.0454034	0.292143	0.0509118	0.0640801	0.130664	0.0628059	GBF4	bZIP	↗	↗
MSYJ268940	0.205495	0.94073	0.268624	0.0295829	0.133886	0.0906813	0.576401	0.985565	0.656229	0.0275674	0.0711505	0.420073	0.863976	0.0726079	0.16538	0.079166	0.208563	0.0152227	0.322705	0.45969	0.0138069	0.553501	0.114841	0.215282	0.65912	0.141214	0.138174	0.490497	0.320153	0.560799	0.290075	0.201848	0.602943	0.0832577	0.221966	0.121693	0.0607999	0.288584	0.0511175	0.0630656	0.140462	0.0802015	CPRF1	bZIP	↗	↗
MSYJ012670	0.215118	0.927698	0.281011	0.0298034	0.14009	0.0948293	0.588484	0.968688	0.672408	0.0319537	0.0780384	0.413311	0.871796	0.0761648	0.173445	0.0816025	0.217941	0.0176778	0.31741	0.46906	0.0161413	0.539606	0.12164	0.224882	0.676233	0.15054	0.147413	0.502923	0.324835	0.548044	0.302854	0.200327	0.588704	0.0870814	0.222518	0.127798	0.0597849	0.276822	0.0565974	0.0571343	0.131419	0.0798569	TIFY10A	Tify	↗	↗
Cluster 1 (the TFs positively associated with most cell wall polysaccharide synthesis genes were shown)
Gene ID	GAUT8	GAUT4	GAUT7	RRT1	MUR1	XGD1	ARAD1	CSLC12	CSLC4	XXT1	XXT5	MUR3	XLT2	MUR2	CESA1	CESA2	CESA3	CSLD3	HCT	C3'H	CSE	CCoAOMT1	F5H	4CLL9	PAL1	C4H	4CL2	COMT	CCR1	CAD1	PME1	PG52	XTH23	PME3	PME31	PG49	PL18	PL1	GAL2	ASD1	EXPA1	EXPA8	Gene symbol	TF Family	GA(I) vs CK(I)	GA(II) vs CK(II)
MSYJ264270	0.0421198	0.708806	0.13506	0.137831	0.0193149	0.152116	0.288344	0.666051	0.355359	0.0175625	0.0238251	0.708482	0.573706	0.0147876	0.025127	0.0305208	0.0434535	0.0185208	0.584244	0.214413	0.064236	0.898975	0.00815491	0.0466683	0.389551	0.0634216	0.0615787	0.220078	0.157092	0.691956	0.149729	0.394986	0.953385	0.14884	0.386067	0.148056	0.205558	0.478953	0.0482876	0.203813	0.361394	0.223099	EJ2	MADS-MIKC	↗	↗
MSYJ210660	0.0186871	0.628863	0.0911182	0.177688	0.0198729	0.165227	0.234767	0.563905	0.272724	0.0328648	0.0219838	0.772722	0.534292	0.033932	0.0129456	0.0562942	0.0214459	0.0463213	0.643888	0.182455	0.0922535	0.998587	0.00571412	0.0230179	0.300519	0.043582	0.0424047	0.167894	0.159641	0.789659	0.102474	0.437122	0.944248	0.16426	0.414679	0.147964	0.251335	0.581621	0.0555969	0.280411	0.453103	0.263837	ERF026	AP2/ERF-ERF	↗	↗
MSYJ205320	0.0358964	0.641258	0.176367	0.189389	0.00466708	0.218466	0.240324	0.639562	0.344122	0.0435698	0.0549173	0.79798	0.483728	0.00466339	0.0154695	0.014079	0.0336785	0.0318149	0.671997	0.1612	0.103895	0.948801	0.00411732	0.0372714	0.406571	0.103346	0.101243	0.184757	0.100709	0.628131	0.191495	0.480558	0.996775	0.214098	0.476721	0.214892	0.26599	0.456325	0.090369	0.21015	0.383155	0.289784	BOA	GARP-G2-like	↗	↗
MSYJ163980	0.0109497	0.579773	0.109204	0.211141	0.00981555	0.204427	0.199458	0.536434	0.255925	0.0483663	0.0385775	0.832086	0.476311	0.0285989	0.00441466	0.0480064	0.0117796	0.0557361	0.701524	0.146385	0.117274	0.958019	0.0015483	0.0133961	0.299684	0.0634285	0.0621693	0.140108	0.125461	0.762516	0.120483	0.491235	0.903597	0.20307	0.470262	0.185973	0.290771	0.578942	0.0797125	0.29145	0.475141	0.306419	RAP2-12	AP2/ERF-ERF	↗	↗
MSYJ008030	0.0485311	0.635237	0.218555	0.210123	0.00566288	0.254982	0.239399	0.661564	0.370294	0.0603112	0.0795936	0.825064	0.45477	0.00207455	0.0229599	0.00607999	0.0440669	0.038203	0.700743	0.151455	0.123051	0.942202	0.0114869	0.0483428	0.448657	0.137819	0.13539	0.190358	0.0789273	0.567786	0.234837	0.515406	0.996182	0.249363	0.518486	0.255875	0.288711	0.416936	0.117446	0.195959	0.370544	0.31709	SAP11	C2H2	↗	↗
MSYJ205470	0.0310673	0.599277	0.186118	0.219827	0.00130702	0.249437	0.212332	0.60958	0.32481	0.05928	0.0692304	0.846954	0.441205	0.00679728	0.0115497	0.0149821	0.0277188	0.0449547	0.719664	0.135612	0.127436	0.989147	0.00440158	0.0311284	0.397127	0.117501	0.11543	0.162247	0.0808449	0.622909	0.200735	0.524338	0.956568	0.245102	0.519856	0.243447	0.300963	0.468954	0.110802	0.229765	0.411515	0.326199	SCL14	GRAS	↗	↗
MSYJ107260	0.0379994	0.516647	0.23638	0.299297	0.00518733	0.338168	0.164121	0.56578	0.307311	0.108948	0.120297	0.960378	0.346729	0.019607	0.0177132	0.0223503	0.0312285	0.0840832	0.832663	0.0881967	0.193279	0.934142	0.0189244	0.0346072	0.407079	0.173045	0.170886	0.128945	0.0388686	0.583815	0.250458	0.634862	0.880915	0.333268	0.632871	0.329843	0.3897	0.478156	0.174903	0.26882	0.466972	0.420016	BHLH91	bHLH	↗	↗
MSYJ109620	0.0265322	0.441333	0.220132	0.349637	0.0101885	0.371568	0.117275	0.48393	0.246722	0.135231	0.134666	0.966067	0.298026	0.0399728	0.014149	0.0461024	0.0199673	0.116793	0.903311	0.0572254	0.232253	0.842708	0.0243325	0.0221557	0.348256	0.175489	0.17379	0.0868543	0.0339884	0.645423	0.231667	0.69316	0.789987	0.368193	0.682149	0.353299	0.446183	0.55546	0.198767	0.335597	0.547784	0.474036	ANL2	HB-HD-ZIP	↗	↗
MSYJ020120	0.0417593	0.302853	0.245397	0.484963	0.0486506	0.486063	0.0485103	0.354954	0.169983	0.225587	0.208149	0.798609	0.196883	0.104985	0.0410254	0.113083	0.0338919	0.211653	0.929926	0.0141214	0.347042	0.671728	0.0685784	0.0342392	0.285588	0.232489	0.231475	0.0338554	0.0330209	0.726395	0.252547	0.846517	0.621856	0.484746	0.823794	0.452393	0.592639	0.687686	0.291271	0.474396	0.709747	0.618704	JKD	C2H2	↘	↗
MSYJ035770	0.0450159	0.594832	0.228099	0.240701	0.00404531	0.28549	0.213248	0.631981	0.351556	0.0768138	0.0944312	0.872579	0.414895	0.00597632	0.0205502	0.00894304	0.0395226	0.052558	0.747134	0.128106	0.147057	0.982142	0.01323	0.0435886	0.438955	0.15208	0.149699	0.169463	0.0617193	0.565378	0.243814	0.5581	0.964092	0.279954	0.560315	0.283862	0.323544	0.431634	0.138151	0.217075	0.399896	0.353139	FRS5	FAR1	↗	↗
MSYJ018780	0.0289286	0.577203	0.190446	0.236258	0.000497215	0.265444	0.19803	0.592793	0.313927	0.068068	0.0769089	0.872496	0.419992	0.00911408	0.0101459	0.0168561	0.0250676	0.0528104	0.74456	0.123074	0.140293	0.988688	0.00528946	0.0283447	0.390831	0.12462	0.122584	0.150688	0.0719859	0.623075	0.204722	0.547071	0.934516	0.261186	0.541947	0.257959	0.319681	0.478056	0.12165	0.241822	0.428052	0.345474		GeBP	↗	↗
MSYJ030860	0.0330923	0.5678	0.206849	0.249457	0.00115325	0.283881	0.193269	0.594786	0.319545	0.0773728	0.0885414	0.890625	0.403131	0.00961432	0.0128138	0.0153484	0.0282888	0.0582615	0.763112	0.115947	0.151781	0.983327	0.0087073	0.031752	0.403425	0.139384	0.137249	0.149132	0.0620376	0.602712	0.221394	0.567083	0.929378	0.279223	0.564107	0.277413	0.334298	0.468022	0.135168	0.241565	0.429767	0.361836	FAR1	FAR1	↗	↗
MSYJ234650	0.0194957	0.565403	0.164464	0.234764	0.000463142	0.25226	0.18893	0.56484	0.287801	0.0638875	0.0661806	0.872501	0.425517	0.0140044	0.00498678	0.0252873	0.0168657	0.0553807	0.743049	0.121737	0.137358	0.967224	0.00195401	0.0195481	0.35664	0.106372	0.104599	0.139035	0.082138	0.667025	0.177635	0.539799	0.912889	0.248964	0.529229	0.240447	0.318379	0.513893	0.111534	0.262099	0.450337	0.341267	ARF9	B3-ARF	↗	↗
MSYJ141000	0.00856499	0.551132	0.122272	0.233144	0.00598726	0.229971	0.179991	0.521026	0.24759	0.0599079	0.0508323	0.868322	0.442452	0.027558	0.00154505	0.0451199	0.00822208	0.0635524	0.73702	0.126542	0.134404	0.933713	0.00131305	0.00986461	0.300932	0.0776276	0.0763205	0.125332	0.106752	0.74645	0.133485	0.525108	0.879365	0.228377	0.505097	0.210861	0.316206	0.578109	0.0964144	0.299628	0.489537	0.333732	CAMTA5	CAMTA	↗	↗
MSYJ129740	0.037282	0.345361	0.244706	0.443877	0.0339537	0.45535	0.068631	0.400719	0.199065	0.197771	0.187609	0.847126	0.221743	0.0808954	0.0315686	0.0871575	0.0293225	0.180012	0.978157	0.0237555	0.312024	0.728619	0.053451	0.0304282	0.313874	0.219613	0.218298	0.0502155	0.0261621	0.685651	0.253572	0.80352	0.67779	0.453074	0.786137	0.427659	0.548596	0.63468	0.265214	0.424345	0.652998	0.576334	VRN1	B3	↘	↗
MSYJ210830	0.0805314	0.620044	0.300982	0.26179	0.0191836	0.332467	0.24099	0.695474	0.417341	0.103798	0.135713	0.883809	0.403576	0.0109602	0.0469375	0.00562373	0.0721218	0.0641407	0.763529	0.14005	0.171587	0.941387	0.0363923	0.0774367	0.523499	0.209464	0.206532	0.204715	0.049753	0.471643	0.318857	0.589798	0.993911	0.324845	0.604199	0.340217	0.343748	0.361757	0.178511	0.187158	0.364196	0.379731	ANL2	HB-HD-ZIP	↗	↗
MSYJ142550	0.0790726	0.523333	0.324979	0.342865	0.0251577	0.409892	0.18323	0.620364	0.371707	0.151776	0.177792	0.999937	0.314427	0.0315351	0.0495029	0.024577	0.0685491	0.10892	0.877793	0.0919217	0.237331	0.956316	0.0495424	0.073162	0.496746	0.247626	0.2449	0.15943	0.0201097	0.481542	0.341041	0.695507	0.904803	0.402775	0.706383	0.410442	0.434332	0.412232	0.234496	0.251242	0.446894	0.472209	NAC6	NAC	↗	↗
MSYJ147710	0.086517	0.76536	0.239593	0.14342	0.0272789	0.202627	0.334566	0.78274	0.464997	0.0375148	0.0693079	0.700222	0.564463	0.00260947	0.0529548	0.00481777	0.0833273	0.0129454	0.583014	0.23069	0.0773831	0.808302	0.0281755	0.0888535	0.527989	0.137683	0.134833	0.275495	0.128218	0.525611	0.25853	0.418196	0.861718	0.195653	0.430505	0.215816	0.208956	0.341703	0.0899364	0.127157	0.27399	0.237279	ATHB-8	HB-HD-ZIP	↗	↗
Citrus_reticulata_newGene_7660	0.132037	0.855379	0.288623	0.120109	0.0553714	0.197758	0.408765	0.88268	0.553028	0.0437758	0.0884999	0.633034	0.629446	0.0142584	0.0903408	0.0120279	0.128463	0.0117616	0.523248	0.289986	0.0686317	0.713751	0.0565516	0.135187	0.613816	0.168781	0.165486	0.347287	0.160964	0.467105	0.309838	0.378383	0.765831	0.1892	0.400995	0.22194	0.176886	0.274797	0.0982836	0.0821953	0.208761	0.207484	NAC078	NAC	↗	↗
MSYJ209350	0.11934	0.769914	0.315663	0.179077	0.0410194	0.263689	0.348563	0.830279	0.520084	0.0719152	0.116929	0.734818	0.533345	0.00912017	0.0773546	0.00265883	0.112773	0.0311455	0.622083	0.230537	0.113125	0.788114	0.051469	0.119423	0.606017	0.20085	0.197482	0.299466	0.107611	0.432217	0.336445	0.470395	0.840222	0.254706	0.494243	0.284834	0.245885	0.280196	0.139581	0.108014	0.253318	0.281095	SOG1	NAC	↗	↗
MSYJ264440	0.0652415	0.381769	0.311192	0.446747	0.0385182	0.487041	0.0980678	0.475592	0.26916	0.209889	0.216118	0.852941	0.215868	0.0724975	0.0488828	0.0701014	0.0543891	0.175773	0.979525	0.0339237	0.319749	0.787129	0.0657173	0.0569807	0.402394	0.266607	0.264646	0.0854727	0.00729264	0.578802	0.322808	0.817748	0.736905	0.482391	0.813982	0.47043	0.550067	0.546245	0.291235	0.374572	0.596359	0.584722	TCP20	TCP	↘	↗
MSYJ251490	0.094663	0.641799	0.322483	0.260004	0.0262886	0.338868	0.259637	0.725867	0.445469	0.108711	0.145684	0.872312	0.413847	0.0130513	0.05785	0.0054003	0.0856659	0.0648847	0.754261	0.152916	0.173179	0.915581	0.0449538	0.0914389	0.554536	0.224646	0.221527	0.224139	0.0531452	0.443342	0.3412	0.586927	0.967684	0.330564	0.605482	0.350418	0.340164	0.335783	0.186222	0.172221	0.344441	0.377737		AP2/ERF-ERF	↗	↗
MSYJ077650	0.10029	0.652888	0.3298	0.257197	0.0292033	0.339061	0.268587	0.739307	0.457316	0.109449	0.148398	0.864553	0.420718	0.0137121	0.0622179	0.00528928	0.0911559	0.0642582	0.747427	0.159551	0.172122	0.903121	0.048149	0.0971119	0.566756	0.229304	0.226114	0.232988	0.0558568	0.433221	0.348866	0.582753	0.955075	0.330502	0.602897	0.352195	0.336362	0.325257	0.187659	0.165303	0.335104	0.374421	ARF1	B3-ARF	↗	↗
MSYJ132740	0.119377	0.609338	0.380479	0.317281	0.0433468	0.408849	0.25044	0.726044	0.463421	0.153454	0.195511	0.938326	0.365314	0.0317016	0.0795196	0.0184661	0.10767	0.0993333	0.822958	0.140034	0.225152	0.944275	0.0701888	0.113779	0.592316	0.281379	0.278063	0.225799	0.0363328	0.397133	0.399427	0.661051	0.994865	0.399639	0.684771	0.422116	0.401312	0.324515	0.242341	0.191854	0.369224	0.443337	SUF4	C2H2	↗	↗
MSYJ161320	0.241595	0.993734	0.426702	0.131	0.129291	0.249748	0.541333	0.937925	0.728178	0.0991098	0.169993	0.565935	0.71433	0.0605771	0.183722	0.0464168	0.235411	0.0467574	0.472646	0.394807	0.102203	0.569853	0.136904	0.244429	0.79871	0.275499	0.271306	0.48421	0.21726	0.335921	0.45188	0.368998	0.61782	0.237818	0.413423	0.294446	0.174309	0.156409	0.164932	0.0276635	0.120363	0.21182	WRKY57	WRKY	↗	↗
MSYJ056770	0.138989	0.797159	0.342337	0.179034	0.0529387	0.272588	0.373362	0.866619	0.554636	0.0804735	0.131108	0.720862	0.548496	0.0152555	0.0934767	0.00624077	0.131825	0.0352313	0.611146	0.249137	0.117443	0.758053	0.064857	0.138977	0.643147	0.220623	0.217056	0.32512	0.115711	0.402506	0.364015	0.467462	0.809485	0.262865	0.495958	0.29806	0.243362	0.253009	0.150865	0.0937462	0.232674	0.280183	COL9	C2C2-CO-like	↗	↗
MSYJ162660	0.0958039	0.470185	0.36528	0.408085	0.0423517	0.478372	0.159796	0.589916	0.363752	0.198414	0.223769	0.920496	0.259395	0.0558428	0.066954	0.0458499	0.083272	0.150096	0.958586	0.0718908	0.294284	0.899035	0.0732067	0.0876807	0.504644	0.294264	0.291566	0.146318	0.00716422	0.470248	0.380513	0.776166	0.848999	0.471148	0.787583	0.476446	0.504732	0.43429	0.288892	0.293648	0.498285	0.545052	NFYA1	NF-YA	↘	↗
MSYJ184340	0.246952	0.961422	0.403278	0.098285	0.13904	0.208801	0.573457	0.917699	0.738494	0.0831652	0.151496	0.508463	0.771739	0.0668756	0.190823	0.056384	0.242917	0.0382467	0.416503	0.429441	0.0773246	0.535473	0.140195	0.251756	0.791728	0.252136	0.248082	0.508469	0.252687	0.372238	0.428277	0.314956	0.583395	0.197468	0.356714	0.253664	0.135843	0.167191	0.139291	0.0216175	0.104122	0.169645	Os07g0563300	B3	↗	↗
MSYJ031740	0.244146	0.938543	0.376224	0.0748517	0.142566	0.175713	0.588266	0.916655	0.733188	0.0689244	0.133138	0.471546	0.808854	0.0701207	0.19072	0.0633457	0.241941	0.0312913	0.379509	0.448631	0.0580692	0.521872	0.138355	0.250446	0.772517	0.227918	0.224048	0.517165	0.276661	0.411239	0.400723	0.276557	0.569973	0.165118	0.314512	0.218998	0.109046	0.186434	0.116741	0.0235404	0.100826	0.139439	HAT14	HB-other	↗	↗
MSYJ258330	0.366084	0.76845	0.47742	0.0716131	0.245337	0.190849	0.753008	0.747715	0.897524	0.124434	0.203991	0.358024	0.961812	0.148528	0.303875	0.137368	0.364772	0.0818407	0.284296	0.599337	0.0843138	0.37612	0.237685	0.374582	0.919835	0.309149	0.304881	0.677227	0.395408	0.375572	0.504009	0.220979	0.419164	0.178721	0.271543	0.249354	0.0859615	0.134275	0.16652	0.00564313	0.0391211	0.115819	MYB44	MYB	↗	↗
MSYJ175420	0.401086	0.813046	0.585567	0.152418	0.257504	0.304992	0.736578	0.722786	0.944396	0.185894	0.280803	0.46042	0.870472	0.157932	0.329097	0.134177	0.394084	0.119398	0.390699	0.567452	0.156898	0.398053	0.266465	0.405127	0.991974	0.405832	0.400935	0.680051	0.343942	0.248731	0.613943	0.339352	0.439331	0.290313	0.403978	0.370849	0.173909	0.0693912	0.253263	0.00315737	0.045328	0.214372	ERF026	AP2/ERF-ERF	↗	↗
MSYJ219180	0.399999	0.80336	0.576295	0.142683	0.258164	0.292375	0.742572	0.720468	0.943847	0.17989	0.27369	0.445693	0.884317	0.158099	0.328731	0.135543	0.393623	0.115738	0.375966	0.574515	0.148862	0.390977	0.265263	0.404583	0.997341	0.397026	0.392179	0.683788	0.351956	0.260441	0.604571	0.324371	0.432353	0.277909	0.387916	0.357942	0.162887	0.0738041	0.244474	0.00175825	0.0418393	0.202247	TIFY4B	Tify	↗	↗
MSYJ158940	0.408456	0.812959	0.598484	0.161081	0.26265	0.316766	0.739876	0.716784	0.952852	0.1943	0.290771	0.467552	0.866617	0.162401	0.33552	0.137471	0.40099	0.125702	0.398789	0.569356	0.165587	0.397398	0.272967	0.412154	0.980443	0.417575	0.412621	0.685031	0.343733	0.238103	0.627017	0.349613	0.438311	0.301851	0.415677	0.383534	0.182648	0.0641378	0.263617	0.00440279	0.0461307	0.223952	TGAL1	bZIP	↗	↗
MSYJ186460	0.407898	0.740205	0.536519	0.0967868	0.275481	0.230737	0.789154	0.698332	0.952933	0.158178	0.246193	0.362131	0.971685	0.171876	0.34056	0.155754	0.405054	0.107027	0.294272	0.627402	0.114263	0.347376	0.272107	0.415558	0.983736	0.359941	0.355385	0.718235	0.409722	0.328287	0.564148	0.244567	0.38857	0.217455	0.302545	0.295227	0.108391	0.102279	0.206592	0.00155488	0.0267914	0.141353	WRKY65	WRKY	↗	↗
MSYJ086140	0.629953	0.885317	0.960342	0.484089	0.443861	0.703708	0.802191	0.635781	0.864145	0.487563	0.612288	0.754265	0.723511	0.343037	0.541152	0.289734	0.610178	0.369653	0.712664	0.614996	0.479136	0.487628	0.491566	0.623113	0.713939	0.771778	0.765905	0.800636	0.364346	0.0337616	0.989633	0.715024	0.516088	0.684311	0.809834	0.783837	0.512158	0.0303506	0.605387	0.143961	0.183797	0.572643	ERF3	AP2/ERF-ERF	↗	↗
MSYJ111900	0.771742	0.729863	0.92378	0.516129	0.572473	0.748003	0.970898	0.483712	0.702888	0.574454	0.710468	0.668342	0.874155	0.452099	0.677162	0.395282	0.752998	0.45396	0.647205	0.776615	0.53922	0.371646	0.616821	0.766774	0.570811	0.875358	0.869285	0.967444	0.503708	0.0268657	0.89357	0.689975	0.393568	0.727665	0.79462	0.840306	0.524378	0.0158629	0.684564	0.16625	0.162413	0.58294	MYC2	bHLH	↗	↗
MSYJ095410	0.0836294	0.355026	0.34621	0.491292	0.0553842	0.535827	0.0911089	0.465822	0.274359	0.244913	0.25207	0.80422	0.185355	0.0925488	0.0669233	0.0875278	0.0713331	0.206183	0.928914	0.0278612	0.360247	0.75726	0.0871439	0.0739062	0.418338	0.304235	0.302248	0.0855741	0.00340059	0.565174	0.357467	0.870782	0.708312	0.530939	0.868525	0.51869	0.597146	0.555351	0.331833	0.40075	0.626308	0.633718	BEH4	BES1	↘	↗
MSYJ048560	0.0647773	0.321764	0.304617	0.496845	0.0525564	0.522163	0.0659798	0.409432	0.223801	0.241177	0.237036	0.78937	0.180451	0.099611	0.0554217	0.10011	0.0541727	0.21285	0.917207	0.0162443	0.361116	0.709154	0.0799582	0.0557066	0.357545	0.276737	0.275193	0.0578045	0.0125511	0.635962	0.313906	0.871375	0.659884	0.518876	0.859859	0.497076	0.604557	0.617893	0.319776	0.439169	0.671079	0.63679	ATHB-5	HB-HD-ZIP	↘	↗
MSYJ265650	0.29015	0.922313	0.460865	0.115766	0.169798	0.241366	0.616782	0.859755	0.799667	0.112962	0.190379	0.500339	0.791842	0.0892613	0.228481	0.0739658	0.284812	0.059837	0.41461	0.46374	0.101339	0.495771	0.174465	0.294416	0.859293	0.299977	0.295615	0.555388	0.271311	0.324309	0.487082	0.327843	0.541884	0.228829	0.377405	0.292997	0.149461	0.130413	0.174503	0.0116131	0.0836548	0.186137	FRS4	FAR1	↗	↗
MSYJ063290	0.293651	0.901823	0.451311	0.102043	0.175303	0.22392	0.632035	0.850291	0.805031	0.106915	0.183174	0.474833	0.818143	0.0932222	0.232787	0.0795598	0.289277	0.0571343	0.389843	0.480209	0.0912231	0.480439	0.177077	0.298796	0.856836	0.290536	0.286239	0.567182	0.288208	0.341009	0.477431	0.304234	0.526469	0.211656	0.352606	0.275628	0.133075	0.135873	0.164059	0.00981451	0.0770933	0.168062	ERF014	AP2/ERF-ERF	↗	↗
MSYJ257410	0.385059	0.903891	0.618046	0.212366	0.236792	0.376018	0.670163	0.773199	0.912943	0.21253	0.309714	0.569404	0.762268	0.145751	0.311408	0.116441	0.374452	0.134545	0.496277	0.499181	0.201169	0.471944	0.256732	0.385606	0.993572	0.441118	0.436055	0.627473	0.278607	0.196293	0.646354	0.438227	0.513489	0.360576	0.505752	0.439831	0.245046	0.061969	0.296095	0.0210466	0.0837971	0.291464	MYB73	MYB	↗	↗
MSYJ012200	0.390469	0.867384	0.604666	0.187103	0.243728	0.346727	0.696162	0.752443	0.925575	0.200577	0.297083	0.525189	0.80496	0.149081	0.317315	0.121903	0.381271	0.126978	0.453308	0.525553	0.182152	0.44136	0.259354	0.392405	0.992611	0.426241	0.421233	0.647902	0.303319	0.215409	0.633061	0.397883	0.48287	0.331554	0.464419	0.411506	0.215375	0.0629725	0.277883	0.0120262	0.0666594	0.259525		MYB-related	↗	↗
MSYJ113570	0.418228	0.825302	0.623849	0.183392	0.268201	0.345605	0.736119	0.714039	0.962201	0.211622	0.310917	0.494086	0.845558	0.168039	0.343542	0.140452	0.409518	0.138059	0.42641	0.563111	0.185788	0.406545	0.282214	0.420891	0.962038	0.441447	0.43638	0.685897	0.334502	0.213826	0.652622	0.379828	0.446901	0.330207	0.448602	0.413557	0.206616	0.0547361	0.286299	0.00897842	0.0528104	0.250091	EZA1	GRAS	↗	↗
MSYJ073010	0.432138	0.949099	0.714808	0.306942	0.272211	0.490008	0.663928	0.768346	0.947479	0.289645	0.394677	0.671276	0.693562	0.183384	0.353907	0.14539	0.417403	0.195922	0.603486	0.487824	0.288597	0.515017	0.304665	0.429054	0.929304	0.536365	0.531013	0.63831	0.261425	0.128186	0.743363	0.555726	0.553741	0.473198	0.631322	0.556626	0.344735	0.0487306	0.390215	0.0575745	0.126373	0.397778	BHLH168	bHLH	↗	↗
MSYJ122040	0.139801	0.478486	0.440795	0.453155	0.0722609	0.542573	0.183989	0.632173	0.418195	0.244576	0.279871	0.887153	0.243124	0.0804463	0.104876	0.0634908	0.124637	0.183806	0.997785	0.0867999	0.340722	0.911519	0.110718	0.129836	0.576156	0.361449	0.358393	0.17961	0.00772287	0.404918	0.457134	0.829065	0.863567	0.53388	0.849457	0.546749	0.54953	0.397959	0.346195	0.295302	0.495841	0.594796	WRKY50	WRKY	↘	↗
MSYJ162170	0.183147	0.384946	0.513494	0.58368	0.122439	0.67157	0.152485	0.569508	0.402205	0.343627	0.373771	0.742534	0.159333	0.14602	0.152352	0.125546	0.165184	0.277314	0.853792	0.0673385	0.457513	0.796969	0.170445	0.16961	0.582307	0.451239	0.448426	0.165985	0.00857797	0.417583	0.527434	0.977757	0.752617	0.663327	0.996057	0.668959	0.687792	0.468324	0.454616	0.397594	0.611717	0.735236	ARF4	B3-ARF	↘	↗
MSYJ065080	0.217607	0.318273	0.560272	0.680571	0.165789	0.762322	0.133407	0.517595	0.385961	0.418831	0.442599	0.640481	0.107933	0.202084	0.191619	0.180552	0.198231	0.351561	0.748643	0.0605002	0.545018	0.708205	0.219061	0.201844	0.577554	0.513694	0.511175	0.158732	0.0210978	0.44772	0.57196	0.917641	0.666751	0.754827	0.903009	0.753247	0.78947	0.53661	0.533464	0.483716	0.706604	0.83702	bHLH143	bHLH	↘	↗

## Sheet: 6
Supplementary materia 6: The cluster 4 and 1 in BA treatment
Cluster 1 (the TFs negatively associated with most cell wall degradation genes were shown)
Gene ID	GAUT8	GAUT4	GAUT7	RRT1	MUR1	XGD1	ARAD1	CSLC12	CSLC4	XXT1	XXT5	MUR3	XLT2	MUR2	CESA1	CESA2	CESA3	CSLD3	HCT	C3'H	CSE	CCoAOMT1	F5H	4CLL9	PAL1	C4H	4CL2	COMT	CCR1	CAD1	PME1	PG52	XTH23	PME3	PME31	PG49	PL18	PL1	GAL2	ASD1	EXPA1	EXPA8	Gene symbol	TF Family	6-BA(I) vs CK(I)	6-BA(II) vs CK(II)
MSYJ142180	0.255076	0.965309	0.354403	0.321548	0.615579	0.0748478	0.0488222	0.47963	0.478641	0.255033	0.246593	0.490665	0.449147	0.361116	0.147366	0.295875	0.0886948	0.36585	0.230824	0.926125	0.258929	0.967246	0.584688	0.19088	0.891712	0.689616	0.160594	0.675845	0.79737	0.931179	0.467677	0.289627	0.814171	0.0444371	0.0290039	0.0178399	0.0202521	0.837757	0.658546	0.256203	0.308495	0.00728331	SPL1	SBP	↗	↗
MSYJ080040	0.25548	0.953429	0.354151	0.319561	0.610212	0.0793132	0.0447081	0.496996	0.482023	0.25317	0.253271	0.491261	0.417865	0.360673	0.148126	0.288649	0.0896034	0.356225	0.221209	0.927401	0.263174	0.957169	0.585072	0.201063	0.892815	0.694566	0.165363	0.677387	0.792831	0.939544	0.47274	0.286	0.83071	0.0487411	0.0366142	0.0239455	0.0145518	0.813901	0.659609	0.248011	0.28313	0.0060581	LD	HB-other	↗	↗
MSYJ146740	0.180903	0.869014	0.268409	0.242783	0.517167	0.0324608	0.101492	0.546644	0.374344	0.185116	0.165082	0.389741	0.477569	0.274699	0.0915606	0.232448	0.0469017	0.299905	0.184192	0.952839	0.178342	0.896308	0.700429	0.116581	0.769014	0.568785	0.0963566	0.560771	0.688108	0.962632	0.362029	0.218462	0.897447	0.0823772	0.047421	0.00215287	0.0267497	0.784485	0.545201	0.356234	0.320922	0.0340679	IDD7	C2H2	↗	↗
MSYJ006710	0.342061	0.879094	0.451632	0.424798	0.745336	0.116733	0.0660091	0.334865	0.56383	0.352618	0.300873	0.589964	0.641081	0.459636	0.220845	0.419983	0.151755	0.504409	0.358267	0.820095	0.327159	0.917659	0.501337	0.219366	0.991067	0.770938	0.21559	0.774141	0.924237	0.793113	0.543911	0.397965	0.648564	0.0215506	0.00233161	0.029376	0.0868552	0.963034	0.759036	0.251658	0.482086	0.0295585	CAMTA2	CAMTA	↗	↘
MSYJ246570	0.290238	0.953446	0.394242	0.367081	0.676245	0.0861007	0.0671425	0.394435	0.506532	0.298483	0.257588	0.529094	0.583035	0.401774	0.177228	0.359299	0.114601	0.438961	0.300308	0.884098	0.279735	0.967807	0.554345	0.185759	0.927495	0.712179	0.175841	0.711316	0.854605	0.863636	0.489058	0.34032	0.721269	0.0317365	0.00867883	0.0148003	0.0603064	0.95866	0.695825	0.273184	0.424866	0.0222226		B3	↗	↘
MSYJ002230	0.245064	0.965303	0.343358	0.313528	0.608291	0.0649043	0.0620139	0.469943	0.460752	0.248195	0.228435	0.476398	0.489309	0.35022	0.13966	0.29599	0.0828574	0.368253	0.23609	0.941777	0.24365	0.997907	0.601009	0.169822	0.873339	0.667373	0.147132	0.658297	0.787403	0.936688	0.447701	0.284575	0.807316	0.0460044	0.0240905	0.00985408	0.0287878	0.857548	0.641806	0.28044	0.339856	0.0136045		C3H	↗	↗
MSYJ250540	0.142497	0.754338	0.219556	0.189611	0.434815	0.0332594	0.114816	0.673512	0.332515	0.137911	0.153625	0.335991	0.340511	0.224631	0.065927	0.16222	0.0303267	0.216064	0.112043	0.876138	0.155289	0.867222	0.770801	0.126904	0.703794	0.524452	0.0857173	0.502888	0.602962	0.859331	0.327808	0.161653	0.971515	0.129006	0.0992202	0.0267608	0.00554765	0.635666	0.485998	0.376022	0.204474	0.0468934	NAC017	NAC	↗	↗
MSYJ217620	0.460806	0.733298	0.581215	0.552465	0.891477	0.195846	0.0610791	0.233075	0.698497	0.472842	0.410816	0.728021	0.721858	0.589931	0.322453	0.545921	0.239541	0.636742	0.474616	0.680674	0.442307	0.790516	0.386347	0.313741	0.865841	0.910435	0.315011	0.917235	0.927895	0.650613	0.675915	0.522979	0.514874	0.0101064	0.00477066	0.0758013	0.140832	0.827156	0.90229	0.194085	0.571156	0.0482154	TULP3	TUB	↗	↘
MSYJ191430	0.438483	0.770029	0.558453	0.525748	0.861659	0.18179	0.036048	0.267355	0.684925	0.445793	0.401803	0.708732	0.641812	0.566844	0.300326	0.508248	0.2178	0.59493	0.431712	0.693402	0.428147	0.779924	0.389124	0.312123	0.877313	0.903441	0.301444	0.902778	0.952909	0.678078	0.665779	0.492577	0.556108	0.00262349	0.0025818	0.0667401	0.107224	0.889677	0.886536	0.168827	0.499914	0.0263642	EIN3	EIL	↗	↘
MSYJ217560	0.245412	0.988554	0.341526	0.319837	0.616123	0.0612563	0.107206	0.434012	0.440048	0.257243	0.205762	0.465754	0.615383	0.348822	0.144689	0.324028	0.0913699	0.402605	0.277102	0.962503	0.229336	0.939857	0.631218	0.137598	0.84799	0.633422	0.136314	0.637596	0.786302	0.92981	0.421137	0.298751	0.77015	0.0592069	0.0223535	0.0069466	0.0711225	0.933512	0.623481	0.344498	0.445338	0.0446354	COL13	C2C2-CO-like	↗	↘
MSYJ035770	0.361352	0.961649	0.468269	0.424107	0.720234	0.163909	0.0134688	0.47168	0.617711	0.350659	0.377854	0.618239	0.353549	0.474699	0.238485	0.368767	0.167124	0.432651	0.281454	0.801754	0.382261	0.794495	0.475246	0.325654	0.969562	0.843508	0.271075	0.814884	0.909737	0.841598	0.613075	0.380698	0.775119	0.0476257	0.062586	0.0844882	0.0313306	0.836763	0.795028	0.15189	0.25074	0.00894333	FRS5	FAR1	↗	↗
MSYJ107230	0.226129	0.856168	0.315401	0.277414	0.541859	0.0841564	0.0611681	0.606977	0.448381	0.21646	0.24656	0.447565	0.305586	0.320863	0.130239	0.232432	0.0797682	0.288185	0.163868	0.993502	0.246655	0.983164	0.647492	0.213023	0.83726	0.657605	0.15994	0.629153	0.721116	0.972151	0.445539	0.241026	0.9427	0.0930929	0.085197	0.0493682	0.00164683	0.688981	0.610367	0.269351	0.188727	0.0220459	HD1	HB-KNOX	↗	↗
MSYJ235870	0.205345	0.826909	0.291411	0.254799	0.513433	0.0727925	0.0726493	0.629212	0.420747	0.196148	0.225642	0.420034	0.303212	0.296715	0.114309	0.212343	0.067541	0.266822	0.147472	0.973894	0.225289	0.983381	0.677923	0.194977	0.804643	0.626321	0.142952	0.598388	0.690299	0.941429	0.418021	0.219915	0.969525	0.103099	0.0909332	0.0455355	0.000285635	0.667521	0.579898	0.292593	0.183608	0.0273973	CAMTA3	CAMTA	↗	↗
MSYJ150510	0.108253	0.695317	0.177605	0.151002	0.381077	0.0202151	0.149788	0.724074	0.281347	0.104809	0.118739	0.285101	0.344302	0.182289	0.0429084	0.1295	0.0156056	0.180087	0.0878619	0.808183	0.119516	0.797152	0.838294	0.0983247	0.637746	0.463204	0.0600684	0.443121	0.54213	0.795837	0.276882	0.126633	0.915304	0.160367	0.121716	0.0297759	0.0145004	0.595079	0.427077	0.433134	0.203799	0.0694996	HSFA4B	HSF	↗	↗
MSYJ203950	0.379647	0.861265	0.494333	0.458291	0.78137	0.147762	0.0197983	0.345955	0.627861	0.381253	0.360751	0.644085	0.531067	0.50205	0.248806	0.429634	0.172149	0.508829	0.35138	0.757144	0.379493	0.813352	0.436756	0.285215	0.939152	0.849793	0.259952	0.839814	0.969653	0.75902	0.613531	0.422327	0.650225	0.00796157	0.00899853	0.0502561	0.0611281	0.995549	0.822265	0.16878	0.397312	0.00572052		C3H	↗	↗
MSYJ010570	0.638774	0.543906	0.768224	0.740457	0.908742	0.330453	0.104188	0.117449	0.882119	0.654875	0.572267	0.917959	0.876715	0.777672	0.484485	0.738306	0.387527	0.835942	0.660909	0.514751	0.611898	0.648865	0.266906	0.455528	0.68928	0.91166	0.469753	0.896449	0.735448	0.473614	0.855152	0.710928	0.345812	0.0371077	0.0459206	0.172034	0.257921	0.631664	0.909902	0.168015	0.736712	0.118827		GeBP	↗	↘
MSYJ071260	0.6065	0.579697	0.736122	0.705286	0.943807	0.30444	0.0754782	0.142095	0.857678	0.619157	0.549888	0.889393	0.808274	0.745374	0.452171	0.695176	0.355676	0.7903	0.613916	0.531836	0.585685	0.649124	0.27132	0.438728	0.707871	0.929246	0.443801	0.919717	0.765062	0.501399	0.833186	0.672936	0.381401	0.0211994	0.0326904	0.15098	0.219016	0.686609	0.934305	0.144982	0.672308	0.0903648	REIL2	C2H2	↗	↘
MSYJ142060	0.545927	0.638348	0.671521	0.642976	0.989701	0.258068	0.0765057	0.172049	0.788061	0.559915	0.487818	0.820729	0.79513	0.680641	0.398838	0.638249	0.308453	0.732859	0.563335	0.596402	0.523393	0.718264	0.323309	0.380603	0.777268	0.99855	0.387979	0.990643	0.83216	0.561096	0.763267	0.613186	0.428977	0.0177444	0.0196078	0.118335	0.193388	0.730492	0.995032	0.175713	0.649189	0.0774014	CAMTA3	CAMTA	↗	↘
MSYJ183810	0.440871	0.751861	0.554114	0.53458	0.864196	0.186836	0.125112	0.236872	0.64894	0.461072	0.370852	0.687191	0.83341	0.562925	0.314134	0.550481	0.23977	0.644365	0.495993	0.742877	0.408859	0.889385	0.457299	0.269901	0.93023	0.84241	0.291424	0.861515	0.967935	0.686348	0.621547	0.514233	0.52036	0.044513	0.0206977	0.0780572	0.18554	0.788379	0.849198	0.288062	0.662629	0.0922228		GeBP	↗	↘
MSYJ282370	0.547161	0.640529	0.673753	0.643119	0.990537	0.258934	0.0634391	0.177209	0.795253	0.559075	0.494403	0.825588	0.765363	0.6828	0.398296	0.633027	0.30661	0.726408	0.554599	0.587846	0.528103	0.700025	0.312331	0.389011	0.767882	0.990488	0.391255	0.982835	0.828736	0.559169	0.771793	0.611291	0.434364	0.0122682	0.0180583	0.118111	0.182381	0.745961	0.997769	0.157231	0.624321	0.0682532	ASIL1	Trihelix	↗	↘
MSYJ135390	0.541523	0.649898	0.668339	0.63621	0.983294	0.25504	0.0534186	0.186289	0.793377	0.551788	0.493282	0.821771	0.73832	0.677295	0.392176	0.622135	0.30021	0.714274	0.541525	0.5887	0.525291	0.692911	0.309923	0.39007	0.768375	0.989678	0.388147	0.984611	0.834036	0.565212	0.771064	0.602965	0.445435	0.00834115	0.0163665	0.115095	0.170797	0.764927	0.999979	0.145972	0.600497	0.0599386	TIFY6B	Tify	↗	↘
MSYJ177460	0.343979	0.87455	0.446143	0.430532	0.741204	0.125785	0.149761	0.323537	0.530814	0.364904	0.276438	0.5683	0.797274	0.454359	0.23454	0.453283	0.173768	0.542286	0.410937	0.871313	0.31168	0.983747	0.569926	0.187551	0.938895	0.714775	0.209927	0.73394	0.903601	0.811013	0.504516	0.414684	0.631406	0.0674931	0.0281222	0.0465665	0.157913	0.888737	0.722213	0.361361	0.615834	0.0932163	DOF5.4	C2C2-Dof	↗	↘
MSYJ068610	0.403007	0.796395	0.516079	0.492917	0.821627	0.157436	0.0930787	0.269231	0.619827	0.418998	0.345142	0.652987	0.751102	0.524625	0.276671	0.499204	0.203148	0.589765	0.440272	0.764892	0.378398	0.890672	0.464752	0.251271	0.953544	0.820972	0.261694	0.833165	0.995569	0.721417	0.595506	0.469248	0.565246	0.0281478	0.00755095	0.0551041	0.14076	0.855808	0.819516	0.262669	0.585624	0.0604588	ALY2	MYB-related	↗	↘
MSYJ182320	0.234698	0.971028	0.324253	0.309709	0.595651	0.0614989	0.163767	0.444914	0.404914	0.252478	0.180687	0.436809	0.700365	0.331532	0.144066	0.330679	0.0980042	0.410626	0.297021	0.98705	0.20877	0.863261	0.690755	0.110682	0.797635	0.582504	0.124417	0.595741	0.754614	0.96087	0.382658	0.295725	0.779908	0.0942542	0.0435852	0.0169739	0.112066	0.959625	0.583722	0.422517	0.516733	0.0862213		B3	↗	↘
MSYJ259200	0.263045	0.984359	0.357972	0.341163	0.637371	0.0745865	0.141714	0.408479	0.444809	0.280093	0.20922	0.476593	0.70132	0.365525	0.164474	0.358128	0.112467	0.440345	0.318502	0.962671	0.238039	0.914687	0.642203	0.134565	0.847088	0.628983	0.14652	0.641349	0.800851	0.91352	0.42233	0.324721	0.738006	0.0744684	0.0302776	0.0182651	0.109544	0.991655	0.628793	0.383409	0.521253	0.0733728		Trihelix	↗	↘
MSYJ231560	0.240789	0.98119	0.331794	0.31647	0.605145	0.0638256	0.156385	0.436484	0.414533	0.258179	0.18738	0.446165	0.696947	0.339134	0.148018	0.335914	0.100378	0.416323	0.300431	0.999769	0.215448	0.877236	0.67788	0.116433	0.810086	0.594248	0.129181	0.606935	0.7656	0.949541	0.392356	0.301667	0.770522	0.0882018	0.0394484	0.0163784	0.10944	0.965327	0.594711	0.410761	0.514542	0.0813681		C3H	↗	↘
MSYJ135800	0.304485	0.93378	0.401265	0.357431	0.630847	0.14112	0.03669	0.567608	0.547922	0.290574	0.33313	0.543184	0.284405	0.406876	0.195709	0.298611	0.134858	0.354213	0.216713	0.894382	0.331447	0.866837	0.559981	0.295844	0.942466	0.766828	0.233378	0.732836	0.81545	0.943168	0.546957	0.314895	0.882189	0.0835632	0.093315	0.0857668	0.015887	0.729812	0.712837	0.199543	0.18577	0.0209744	HSFA8	HSF	↗	↗
MSYJ004000	0.276457	0.886543	0.368401	0.325444	0.588752	0.128518	0.0504211	0.608661	0.51215	0.261854	0.308635	0.505899	0.262847	0.373679	0.174607	0.267004	0.118957	0.319408	0.188794	0.939984	0.30489	0.906872	0.602206	0.277394	0.898329	0.726881	0.213191	0.691591	0.770484	0.990377	0.512344	0.284016	0.928927	0.100252	0.106098	0.0845103	0.011038	0.686258	0.671723	0.226942	0.163998	0.0280067		C3H	↗	↗
MSYJ264230	0.0874147	0.552909	0.138704	0.109792	0.29067	0.0565736	0.215728	0.900949	0.24202	0.0746711	0.127624	0.232271	0.218645	0.141649	0.0441199	0.0724829	0.0318026	0.104155	0.0341352	0.700053	0.114883	0.742354	0.953912	0.135411	0.550567	0.409034	0.0763547	0.375131	0.438723	0.660115	0.246441	0.0838958	0.7464	0.261915	0.226874	0.0996094	0.0358064	0.426321	0.358636	0.504103	0.105379	0.132871	CAMTA4	CAMTA	↗	↗
MSYJ020630	0.0710125	0.559886	0.122979	0.0971858	0.283974	0.0357268	0.218309	0.876761	0.219966	0.062197	0.100762	0.214956	0.263913	0.126234	0.028146	0.0693115	0.0165776	0.105058	0.035825	0.68921	0.0919544	0.712088	0.962086	0.103458	0.534082	0.384866	0.0534648	0.356657	0.431383	0.661676	0.221566	0.074316	0.764146	0.249987	0.207574	0.078676	0.0353544	0.45506	0.340912	0.520276	0.138434	0.127742	RAP2-7	AP2/ERF-ERF	↗	↗
MSYJ182810	0.68918	0.501599	0.822233	0.790779	0.855891	0.370567	0.0945591	0.102348	0.944349	0.702188	0.62923	0.977067	0.859182	0.831675	0.528118	0.779275	0.425494	0.875744	0.693836	0.457657	0.667085	0.578381	0.218427	0.511594	0.626876	0.844632	0.51905	0.833501	0.680355	0.426851	0.919002	0.757406	0.316103	0.0385276	0.0586415	0.200931	0.270648	0.613323	0.847687	0.129539	0.732288	0.123908	ARF6	B3-ARF	↗	↘
MSYJ110590	0.448921	0.752126	0.556695	0.543622	0.863785	0.20187	0.18221	0.239703	0.635103	0.474631	0.365117	0.679193	0.922225	0.565518	0.330232	0.574621	0.261365	0.669914	0.531527	0.7742	0.40764	0.945232	0.501771	0.261275	0.959799	0.813386	0.297054	0.84112	0.97954	0.699867	0.6045	0.529614	0.516459	0.0816019	0.0469171	0.0988772	0.234952	0.749514	0.830827	0.357493	0.74108	0.138608	RVE5	MYB-related	↗	↘
MSYJ185430	0.369109	0.841679	0.474042	0.457792	0.773441	0.141443	0.145476	0.299417	0.560469	0.39025	0.299858	0.598619	0.812487	0.482432	0.255405	0.479776	0.191273	0.570336	0.434885	0.838992	0.336204	0.986262	0.542144	0.207403	0.971635	0.746278	0.230551	0.766042	0.936841	0.778389	0.533616	0.441144	0.600908	0.062157	0.0261246	0.0545991	0.167042	0.859207	0.754272	0.345342	0.632856	0.0944046	RLT1	HB-other	↗	↘
MSYJ074340	0.178346	0.8809	0.261191	0.245192	0.51599	0.0314889	0.163419	0.522851	0.344179	0.192087	0.137896	0.370287	0.616267	0.267814	0.0971655	0.25949	0.058433	0.332515	0.227371	0.915177	0.159792	0.814186	0.750243	0.080966	0.727994	0.520933	0.0844007	0.527458	0.674688	0.95542	0.32574	0.230255	0.871491	0.109428	0.0566731	0.00589795	0.0800267	0.85746	0.514718	0.441888	0.437562	0.0784113	RHL1	bHLH	↗	↘
MSYJ095040	0.21699	0.727235	0.289972	0.248291	0.466167	0.127778	0.118191	0.775738	0.425927	0.19703	0.269188	0.410684	0.171003	0.293736	0.140304	0.184346	0.102632	0.221242	0.116087	0.917245	0.255275	0.984945	0.744926	0.263211	0.769547	0.623143	0.186976	0.579481	0.634257	0.851964	0.432423	0.208947	0.899173	0.189235	0.188489	0.122491	0.021079	0.525224	0.559903	0.323381	0.0847292	0.0809824		NF-YB	↗	↗
MSYJ029260	0.194002	0.694638	0.263268	0.223297	0.434462	0.115461	0.132498	0.800534	0.394714	0.174723	0.245662	0.379751	0.170806	0.266856	0.122939	0.162587	0.0895389	0.198111	0.0987552	0.880058	0.231378	0.946118	0.780031	0.242797	0.73238	0.587457	0.168139	0.544615	0.59959	0.817374	0.401247	0.185803	0.869424	0.201335	0.195528	0.118719	0.0208641	0.502403	0.525422	0.351152	0.0811717	0.0881571	ADA2	MYB-related	↗	↗
MSYJ093000	0.223114	0.75616	0.29991	0.258197	0.485857	0.122327	0.102846	0.741601	0.437069	0.204508	0.270651	0.423955	0.189907	0.303999	0.141593	0.196099	0.100579	0.236431	0.126323	0.941814	0.258995	0.998775	0.718818	0.259451	0.790372	0.637973	0.186169	0.596331	0.656987	0.880429	0.442115	0.218672	0.932261	0.168619	0.168236	0.10993	0.0155885	0.556202	0.576713	0.305098	0.0996244	0.0673276	REF6	C2H2	↗	↗
MSYJ016930	0.17051	0.713043	0.243037	0.206122	0.430637	0.0807383	0.119347	0.755398	0.369332	0.156053	0.208832	0.360504	0.22182	0.247161	0.0969144	0.156182	0.0624273	0.198231	0.0964006	0.878422	0.199854	0.919587	0.774536	0.197792	0.721197	0.563412	0.133874	0.527438	0.598155	0.830767	0.372101	0.171534	0.903559	0.170221	0.156316	0.0805616	0.00788167	0.544079	0.508867	0.353949	0.11578	0.0667734	AL1	Alfin-like	↗	↗
MSYJ020120	0.167476	0.715592	0.240391	0.203956	0.430183	0.076244	0.118172	0.749287	0.365819	0.15373	0.203848	0.357883	0.229682	0.244588	0.0936161	0.155629	0.0590339	0.198577	0.0965102	0.877934	0.195637	0.915472	0.774211	0.191667	0.719439	0.559922	0.129352	0.524968	0.597906	0.832497	0.368045	0.169826	0.90827	0.166406	0.151299	0.0756498	0.00667448	0.550178	0.506502	0.355033	0.121322	0.0643838	JKD	C2H2	↗	↗
Cluster 2 (the TFs negatively associated with most cell wall polysaccharide synthesis genes were shown)
Gene ID	GAUT8	GAUT4	GAUT7	RRT1	MUR1	XGD1	ARAD1	CSLC12	CSLC4	XXT1	XXT5	MUR3	XLT2	MUR2	CESA1	CESA2	CESA3	CSLD3	HCT	C3'H	CSE	CCoAOMT1	F5H	4CLL9	PAL1	C4H	4CL2	COMT	CCR1	CAD1	PME1	PG52	XTH23	PME3	PME31	PG49	PL18	PL1	GAL2	ASD1	EXPA1	EXPA8	Gene symbol	TF Family	6-BA(I) vs CK(I)	6-BA(II) vs CK(II)
MSYJ252970	0.000214341	0.345377	0.0107696	0.00781303	0.109207	0.0625509	0.478928	0.903603	0.0446774	0.00296826	0.00963418	0.0478055	0.429262	0.0122114	0.0155904	0.023258	0.045239	0.0448421	0.0401484	0.393959	0.00290511	0.378638	0.706635	0.0348351	0.25889	0.139879	0.0164664	0.129473	0.204927	0.406926	0.0435038	0.00846418	0.552528	0.470819	0.382272	0.175437	0.192045	0.368031	0.12056	0.866318	0.281812	0.331152	NAC047	NAC	↗	↘
MSYJ178740	0.00909909	0.280492	0.00336038	0.00795154	0.071654	0.108385	0.592193	0.813683	0.0147767	0.0146418	0.0145779	0.019066	0.491276	0.00395106	0.0459677	0.0357312	0.0901014	0.0497249	0.0693655	0.303899	0.00731144	0.282055	0.592667	0.0495541	0.182604	0.0815378	0.040219	0.0759902	0.145185	0.327053	0.013678	0.01634	0.478475	0.574841	0.474241	0.244536	0.275469	0.34244	0.0696418	0.99535	0.344554	0.430033	MYB62	MYB	↗	↘
MSYJ229060	0.00517245	0.263781	0.00138021	0.000152968	0.0640905	0.106517	0.556374	0.790774	0.0265016	0.00464935	0.0266759	0.0238271	0.400716	0.00169773	0.0383294	0.0126785	0.0798013	0.0225759	0.0369981	0.318343	0.0136285	0.325267	0.615335	0.0680909	0.19943	0.103444	0.0436894	0.0885928	0.144673	0.322231	0.0294431	0.00292075	0.453103	0.561309	0.471017	0.24197	0.241369	0.288439	0.0805091	0.947458	0.267682	0.403836	BZIP44	bZIP	↗	↘
MSYJ008890	0.00360269	0.279404	0.0014967	0.00154239	0.0713032	0.0985842	0.553116	0.813826	0.0243866	0.00519016	0.0190403	0.0244454	0.42799	0.00206027	0.035067	0.0185819	0.0755007	0.0313822	0.0442706	0.324893	0.00847297	0.320783	0.622672	0.05633	0.202641	0.101586	0.0368035	0.0898562	0.152498	0.33529	0.0256297	0.00547851	0.474117	0.550148	0.457226	0.230999	0.241401	0.313679	0.0820895	0.947556	0.288863	0.398479	HSFA1	HSF	↗	↘
MSYJ112280	0.00317284	0.295271	0.00742148	0.00198252	0.0838957	0.0866859	0.499496	0.832265	0.04467	0.000699519	0.028127	0.0407432	0.363387	0.0081199	0.0255328	0.00700774	0.0596605	0.0201159	0.0222732	0.364929	0.0147909	0.377867	0.673449	0.0653788	0.239952	0.136107	0.0351822	0.118022	0.175641	0.361969	0.0479744	0.000456632	0.487623	0.511106	0.427888	0.210519	0.199858	0.297215	0.108552	0.880733	0.231737	0.355252		B3	↗	↘
MSYJ071860	0.00085035	0.306487	0.00541415	0.00234737	0.0874489	0.0806568	0.50706	0.850629	0.0375407	0.00126751	0.0179618	0.0370913	0.402727	0.00632371	0.0234855	0.0142574	0.0579507	0.0301283	0.0330357	0.362373	0.00759574	0.361072	0.669694	0.0512543	0.234614	0.126342	0.0279812	0.112593	0.177672	0.368506	0.0387714	0.003091	0.50473	0.507979	0.420116	0.203442	0.207829	0.324494	0.103776	0.894643	0.263493	0.358487		C3H	↗	↘
MSYJ249790	0.046577	0.147659	0.0140426	0.0217608	0.0132805	0.216327	0.749337	0.607028	0.00860673	0.0458142	0.0745796	0.00188237	0.45223	0.0125046	0.11581	0.0432881	0.180907	0.0349331	0.0899381	0.181592	0.0556571	0.20212	0.432676	0.139015	0.0940933	0.0391522	0.118633	0.025422	0.0562719	0.187059	0.0152652	0.0338957	0.306531	0.756954	0.655919	0.391007	0.388775	0.211668	0.0208159	0.852003	0.336743	0.582825	DF1	Trihelix	↗	↘
MSYJ007820	0.0244803	0.190444	0.00366197	0.00754845	0.0288136	0.167046	0.667495	0.679797	0.0112188	0.023611	0.0504864	0.00589425	0.425205	0.00287002	0.0791127	0.0249796	0.134743	0.0239518	0.0623792	0.234069	0.0336904	0.250063	0.505606	0.106002	0.133277	0.0613408	0.083362	0.0467699	0.0877206	0.238277	0.0165172	0.0157077	0.362375	0.674788	0.577989	0.326476	0.323858	0.237365	0.0406523	0.935295	0.302357	0.506187		C3H	↗	↘
MSYJ253970	0.019744	0.203409	0.00206018	0.00507151	0.0343424	0.154743	0.646779	0.700476	0.0127312	0.0190185	0.0447275	0.00798792	0.421127	0.00147845	0.0704736	0.0218074	0.123557	0.0228763	0.056928	0.248721	0.0286889	0.262658	0.525239	0.0975873	0.144386	0.0677968	0.0747891	0.0532787	0.0972824	0.253129	0.0175416	0.0123062	0.378915	0.653345	0.55751	0.309888	0.308061	0.246714	0.0468088	0.956519	0.296044	0.48679	PP2C27	DBP	↗	↘
MSYJ243640	0.0175381	0.226556	0.00175944	0.00748083	0.0445236	0.143778	0.648325	0.735027	0.00708697	0.0206828	0.0316601	0.00719881	0.472788	0.00155354	0.0666853	0.0329028	0.118883	0.038563	0.0714917	0.254386	0.0199245	0.248607	0.530758	0.0779321	0.14509	0.0607811	0.0642388	0.0520342	0.107115	0.270832	0.00893152	0.0172549	0.410909	0.640475	0.539267	0.295105	0.31344	0.289199	0.0462828	0.948081	0.337092	0.483739	CPRF2	bZIP	↗	↘
MSYJ178520	0.00878514	0.278616	0.0029511	0.00731528	0.0705776	0.108663	0.591531	0.811266	0.0148484	0.0140285	0.0151013	0.0187683	0.486936	0.00351629	0.0457225	0.034411	0.0898975	0.0480874	0.0677451	0.303436	0.00750743	0.283096	0.592423	0.0505614	0.182418	0.0818338	0.0405041	0.0758313	0.144239	0.325658	0.0139735	0.0154908	0.476049	0.575292	0.475092	0.245091	0.274466	0.339004	0.0694175	0.994301	0.340948	0.429691	ERF118	AP2/ERF-ERF	↗	↘
MSYJ133770	0.00238276	0.330143	0.0078565	0.00844396	0.0992141	0.0747917	0.519052	0.883487	0.0321138	0.00739705	0.00682546	0.0372576	0.467996	0.00912457	0.0247762	0.0310949	0.0592179	0.051542	0.0550101	0.364116	0.00133146	0.339975	0.668427	0.0332787	0.232206	0.116907	0.0210895	0.110114	0.187057	0.384646	0.0299839	0.0126499	0.537054	0.502925	0.408352	0.194597	0.22291	0.372988	0.102336	0.914338	0.317255	0.364677	MYB62	MYB	↗	↘
MSYJ232060	0.00158286	0.357307	0.0168083	0.00961772	0.11963	0.0555975	0.439427	0.916068	0.0616811	0.00111133	0.0186159	0.0615958	0.379367	0.0183324	0.0101684	0.015631	0.0350741	0.037208	0.0245139	0.424736	0.00962744	0.423116	0.744985	0.0440408	0.288056	0.167482	0.017285	0.152066	0.223135	0.427118	0.0621888	0.00605373	0.561962	0.442918	0.362038	0.16203	0.1619	0.354789	0.141855	0.81598	0.238238	0.299895		MYB-related	↗	↘
MSYJ260560	0.00101013	0.334587	0.0120892	0.00589919	0.105695	0.0658437	0.463025	0.8865	0.053355	0.000180805	0.0199809	0.0522908	0.378287	0.0133282	0.0149175	0.0125141	0.0434242	0.0312572	0.0243464	0.400977	0.00974027	0.402915	0.716838	0.0493966	0.268269	0.153372	0.0222804	0.137534	0.204569	0.402602	0.0546406	0.00343409	0.535538	0.468115	0.385613	0.178883	0.17685	0.33605	0.127691	0.842592	0.239594	0.320956	ERF115	AP2/ERF-ERF	↗	↘
MSYJ119150	0.0148866	0.234577	0.00113194	0.00614822	0.0482021	0.136381	0.634538	0.747504	0.00877243	0.0179599	0.0287847	0.00906474	0.468063	0.00105074	0.0614669	0.03072	0.111974	0.0375845	0.0676168	0.264278	0.0173763	0.257971	0.543872	0.0735412	0.152869	0.065813	0.0593566	0.056857	0.113482	0.280332	0.010417	0.0151896	0.420865	0.626824	0.526536	0.284937	0.302927	0.293941	0.0508413	0.96268	0.331386	0.471103	TCP13	TCP	↗	↘
MSYJ152880	0.0140579	0.289947	0.00758082	0.0145225	0.0780038	0.112073	0.607983	0.823925	0.0133964	0.0220609	0.0129603	0.0205223	0.52997	0.00828351	0.0522698	0.0484292	0.0973088	0.0640726	0.0857256	0.300567	0.0080891	0.267024	0.585041	0.0451549	0.178675	0.0758271	0.0420041	0.0740995	0.14845	0.331514	0.0106455	0.025167	0.490829	0.581579	0.477127	0.247989	0.291705	0.366872	0.0684776	0.985321	0.378136	0.442467	APRR2	GARP-ARR-B	↗	↗
MSYJ065500	0.0128833	0.330785	0.013409	0.0195346	0.101229	0.0917122	0.570873	0.879394	0.0234213	0.0225154	0.00578329	0.0334167	0.545071	0.0146617	0.0423874	0.0549223	0.0816131	0.0762802	0.0886035	0.338272	0.00404079	0.293723	0.630001	0.0299781	0.208626	0.094627	0.0298736	0.0951325	0.178936	0.373738	0.0186382	0.029168	0.54018	0.537989	0.434453	0.216443	0.268711	0.406872	0.0891232	0.975337	0.386298	0.407826	GATA25	C2C2-GATA	↗	↗
MSYJ017470	0.00235553	0.385867	0.0215077	0.0148779	0.135923	0.0441966	0.423619	0.954283	0.0664317	0.00398299	0.0127903	0.0693681	0.405532	0.0234172	0.00627105	0.0245608	0.0280773	0.050366	0.0329105	0.445673	0.00677481	0.432092	0.768627	0.0321249	0.303916	0.175681	0.00998948	0.163333	0.242518	0.454317	0.0649608	0.0117165	0.597151	0.419093	0.336968	0.143817	0.154647	0.389602	0.153208	0.8007	0.257778	0.283964	DIVARICATA	MYB	↗	↘
MSYJ012070	0.0475497	0.191027	0.0175312	0.0310298	0.0345268	0.202603	0.762553	0.668163	4.3492e-05	0.0544585	0.0542103	0.00278357	0.559159	0.0166554	0.11513	0.070151	0.179372	0.070061	0.124591	0.189157	0.0436121	0.171139	0.436861	0.10645	0.0936288	0.0255324	0.104402	0.0233576	0.0748706	0.21857	0.000970916	0.048611	0.365435	0.741662	0.629802	0.37097	0.408681	0.295076	0.0203606	0.826153	0.423857	0.586833	AL5	Alfin-like	↗	↘
MSYJ186720	0.0207122	0.253166	0.00662311	0.0152832	0.0593184	0.138051	0.654334	0.770146	0.00589768	0.0279022	0.0234455	0.0110525	0.530383	0.00678773	0.0684409	0.0498214	0.119766	0.0600269	0.092162	0.262219	0.0162077	0.235949	0.536427	0.0628798	0.148687	0.0572523	0.0588713	0.054625	0.120719	0.291245	0.00466885	0.0278021	0.445472	0.63142	0.52493	0.28514	0.324533	0.336338	0.0497042	0.936757	0.38446	0.485554	AG1	MADS-MIKC	↗	↘
MSYJ253510	0.0152784	0.271422	0.00566087	0.0128143	0.0679347	0.12203	0.624285	0.798126	0.00992148	0.0223691	0.0173503	0.0155454	0.521033	0.00610459	0.0573367	0.0456103	0.104923	0.0585225	0.0842789	0.284296	0.0109	0.256573	0.565449	0.0533438	0.166106	0.0685672	0.0484023	0.065573	0.135197	0.312641	0.00820858	0.0237619	0.468024	0.601456	0.496945	0.262926	0.301861	0.347672	0.0600862	0.968648	0.372854	0.458031		PLATZ	↗	↘
MSYJ249800	0.0142408	0.245437	0.00183188	0.00741697	0.0536645	0.131169	0.630309	0.762988	0.00867278	0.0184751	0.0247009	0.0105248	0.48276	0.00191232	0.059341	0.0343224	0.108901	0.0430359	0.0716251	0.270418	0.0147485	0.257858	0.550867	0.0668267	0.15682	0.0664657	0.0552766	0.0592173	0.119761	0.290015	0.00932962	0.0169604	0.434968	0.618219	0.51672	0.277377	0.301423	0.30948	0.0533314	0.9655	0.342596	0.466052	DF1	Trihelix	↗	↘
MSYJ179080	0.00849172	0.433296	0.0324295	0.0284418	0.164327	0.0325567	0.415091	0.985055	0.0729301	0.0149516	0.004636	0.0822632	0.47284	0.034955	0.00705405	0.0480134	0.0252966	0.0809047	0.058526	0.472421	0.00461042	0.433148	0.795313	0.0133773	0.323379	0.183356	0.00251846	0.178265	0.272597	0.495836	0.0674329	0.0276263	0.655741	0.392381	0.305585	0.122522	0.158532	0.457492	0.168845	0.795272	0.3121	0.272765	EIN3	EIL	↘	↘
MSYJ076170	0.058932	0.140036	0.0212345	0.0326962	0.0127838	0.237829	0.79537	0.589264	0.00543393	0.0606088	0.0812949	0.00094362	0.499698	0.0195233	0.135036	0.0617627	0.204639	0.0522489	0.115511	0.157871	0.0638918	0.168712	0.397271	0.146433	0.0747251	0.0244034	0.132918	0.0147051	0.0468039	0.17142	0.0109987	0.0485406	0.29695	0.794284	0.687809	0.418176	0.428559	0.225149	0.0113736	0.801633	0.381899	0.623481	NSP2	GRAS	↗	↘
MSYJ181960	0.0485327	0.199382	0.0191897	0.0334069	0.039305	0.200629	0.762878	0.679077	0.000304846	0.0565269	0.0520836	0.0044278	0.574458	0.0184273	0.11544	0.0748945	0.179248	0.0761577	0.130156	0.192616	0.0427411	0.169003	0.43996	0.102296	0.0957666	0.0254894	0.102821	0.0249516	0.0795828	0.225385	0.000379272	0.0516498	0.376068	0.73793	0.62478	0.367499	0.410861	0.308614	0.0221539	0.82464	0.436343	0.586212	ASR3	Trihelix	↗	↗
MSYJ229450	0.0260075	0.25918	0.0109719	0.0214714	0.0642332	0.143295	0.669081	0.775179	0.00570632	0.0349837	0.0240284	0.0128685	0.559921	0.0111909	0.0751958	0.0605808	0.127474	0.0717124	0.105879	0.258577	0.0184622	0.223987	0.528675	0.0617258	0.145194	0.0531595	0.0622991	0.0533426	0.122761	0.293288	0.00332624	0.0357626	0.452947	0.639618	0.530271	0.290629	0.339296	0.353781	0.049009	0.919758	0.410679	0.497828	NFYC3	NF-YC	↗	↗
MSYJ183100	0.0101558	0.445326	0.0362502	0.0315761	0.17252	0.0286816	0.402736	0.970566	0.078964	0.0166048	0.0057982	0.088574	0.471422	0.0389102	0.00586916	0.0503431	0.0221505	0.0845178	0.0590381	0.485878	0.00624039	0.445711	0.810793	0.0126699	0.335089	0.192511	0.00155276	0.18736	0.283225	0.509058	0.0731981	0.0300249	0.669077	0.379918	0.294401	0.115092	0.151064	0.466299	0.177712	0.780426	0.310088	0.262222	TCP2	TCP	↘	↘
MSYJ071090	0.0991682	0.108134	0.0482108	0.0652614	0.011674	0.305889	0.900321	0.517922	0.0145544	0.102392	0.11964	0.0102008	0.559668	0.04574	0.191668	0.102211	0.271659	0.0854649	0.167929	0.107198	0.101456	0.116167	0.317722	0.192433	0.0398862	0.0084826	0.185298	0.0021134	0.0253505	0.126588	0.0206204	0.0867459	0.249878	0.894292	0.782117	0.501089	0.519298	0.220372	0.000970339	0.698178	0.448754	0.722775	BZIP9	bZIP	↗	↘
MSYJ175070	0.0991096	0.129649	0.0498506	0.0692134	0.0223156	0.297983	0.902133	0.548346	0.0116164	0.105658	0.110201	0.0114445	0.605083	0.0477054	0.190117	0.11358	0.269222	0.100792	0.182187	0.113637	0.0957479	0.105638	0.323552	0.177214	0.0422339	0.00430791	0.177936	0.00292071	0.0356099	0.143353	0.0151228	0.092855	0.278685	0.883709	0.767114	0.489568	0.525094	0.25837	0.00240346	0.691216	0.485277	0.720959	ALFIN-1	Alfin-like	↗	↘
MSYJ115030	0.0706821	0.122621	0.0284656	0.040703	0.00843291	0.260664	0.825421	0.557003	0.00914105	0.0715727	0.0959892	0.00313159	0.500303	0.0264105	0.152149	0.0693151	0.225129	0.0562069	0.125496	0.140579	0.0769653	0.157198	0.371763	0.165528	0.0635911	0.0212385	0.150952	0.0106575	0.0366393	0.15199	0.0158071	0.057396	0.272383	0.827507	0.721003	0.44672	0.45294	0.209539	0.00773343	0.773916	0.387827	0.653217		PLATZ	↗	↘
MSYJ037240	0.0696911	0.142528	0.0288608	0.0436466	0.0175106	0.252517	0.829288	0.586136	0.00434924	0.0740694	0.0852675	0.0026725	0.547801	0.0271228	0.150133	0.0801901	0.222566	0.0710051	0.139745	0.144453	0.0700627	0.143447	0.374817	0.149112	0.0634179	0.0146308	0.142805	0.00927506	0.044924	0.166736	0.00838223	0.0627371	0.299817	0.818402	0.706975	0.435514	0.459898	0.24733	0.00704353	0.763949	0.426028	0.652855	AGL19	MADS-M-type	↗	↘
MSYJ120960	0.0543096	0.149103	0.0186077	0.0299404	0.0156369	0.227991	0.78327	0.605045	0.00387454	0.0565814	0.0746914	0.000350835	0.503291	0.0170644	0.128083	0.0597977	0.196217	0.0520819	0.112778	0.165642	0.058262	0.17272	0.408303	0.137541	0.0796569	0.0255489	0.125109	0.0166239	0.0519964	0.180912	0.00877699	0.0456122	0.30951	0.779866	0.673059	0.40567	0.419179	0.234817	0.0131779	0.812435	0.382606	0.611246	ARF19	B3-ARF	↗	↘
MSYJ219480	0.0416028	0.270053	0.0237078	0.0382277	0.075772	0.160713	0.706896	0.779953	0.00815733	0.0541827	0.030241	0.0192506	0.623453	0.0239737	0.0948287	0.0868322	0.149675	0.0991909	0.138768	0.249055	0.027903	0.198082	0.508266	0.0650506	0.137442	0.0459046	0.0751043	0.0518574	0.126953	0.295295	0.00356434	0.0564041	0.465088	0.664268	0.549108	0.309375	0.37673	0.38898	0.0488553	0.878519	0.468559	0.530713	UNE12	bHLH	↗	↗
MSYJ179090	0.0349578	0.425362	0.0661013	0.0460174	0.184635	0.0561003	0.324519	0.973773	0.14424	0.0252212	0.0727117	0.135303	0.251057	0.0680023	0.0199497	0.0236902	0.0278998	0.0463972	0.00687279	0.547014	0.0581128	0.583576	0.883031	0.0955556	0.407066	0.281827	0.0450915	0.252358	0.310977	0.518614	0.149198	0.0294486	0.619042	0.361083	0.306156	0.136284	0.0880357	0.346257	0.238392	0.656322	0.13112	0.214916	EIN3	EIL	↘	↘
MSYJ269700	0.0213905	0.497027	0.0542312	0.0495564	0.207827	0.0193367	0.37601	0.909744	0.0989442	0.0302974	0.00861006	0.112395	0.505997	0.0574719	0.00855283	0.0717364	0.01892	0.11204	0.0778199	0.529545	0.0131124	0.474406	0.857011	0.00614667	0.372133	0.21891	0.000414622	0.217432	0.32383	0.559813	0.090568	0.0477359	0.728177	0.343633	0.258694	0.0930979	0.141903	0.52198	0.207733	0.748468	0.33747	0.238454	DOF4.6	C2C2-Dof	↘	↗
MSYJ182070	0.0203449	0.498126	0.0548192	0.0482265	0.209229	0.0160682	0.359628	0.908587	0.104377	0.027617	0.0116261	0.116099	0.480436	0.0580564	0.00506681	0.0659057	0.0137414	0.105781	0.0685698	0.539793	0.0148068	0.491922	0.870767	0.0099609	0.382017	0.228755	2.91534e-05	0.224736	0.328452	0.56477	0.0969495	0.044519	0.727788	0.333184	0.251596	0.0879209	0.128239	0.511422	0.214446	0.727893	0.315164	0.225463	ERF113	AP2/ERF-ERF	↘	↘
MSYJ163840	0.182478	0.0987433	0.113728	0.141042	0.0425711	0.420421	0.933613	0.445786	0.0492591	0.190936	0.191306	0.0488923	0.702566	0.110428	0.296817	0.195815	0.390194	0.171767	0.281014	0.0555908	0.175621	0.046552	0.216017	0.269134	0.0107296	0.00356044	0.278925	0.00686003	0.0241634	0.0926174	0.0537083	0.172628	0.220122	0.958025	0.919753	0.630796	0.675877	0.264723	0.00967435	0.539351	0.597087	0.881092	ALFIN-1	Alfin-like	↗	↗
MSYJ068440	0.167182	0.139675	0.105511	0.134118	0.0570586	0.384311	0.968564	0.513769	0.0409037	0.179792	0.163443	0.0463962	0.744968	0.10294	0.273656	0.196602	0.362153	0.180713	0.281681	0.0818989	0.153293	0.049546	0.251962	0.230439	0.0255434	0.00237829	0.249057	0.0115283	0.0453765	0.131461	0.0415615	0.166764	0.276906	0.991259	0.864712	0.584467	0.651258	0.319394	0.0144461	0.566101	0.624357	0.842858	PPD7	C2H2	↗	↗
MSYJ091930	0.165422	0.0804581	0.09827	0.121959	0.0257769	0.404834	0.964448	0.432411	0.0428164	0.170276	0.183953	0.0383484	0.639486	0.094844	0.277403	0.167699	0.369377	0.141674	0.247327	0.056922	0.164754	0.0648209	0.227204	0.265789	0.0112581	0.0050447	0.266224	0.0025935	0.0133373	0.0825407	0.049641	0.150086	0.199887	0.975608	0.907201	0.616027	0.642411	0.223973	0.00420402	0.571976	0.539955	0.854061	GATA26	C2C2-GATA	↗	↘
MSYJ120120	0.140212	0.102205	0.0797302	0.102629	0.0256088	0.363513	0.989099	0.481103	0.0288746	0.146659	0.153378	0.0271521	0.640033	0.0768452	0.244593	0.150182	0.331962	0.129944	0.22695	0.076804	0.136917	0.0740818	0.261254	0.228447	0.0207487	0.00140143	0.231314	0.000796961	0.0221072	0.106984	0.0337847	0.129874	0.234497	0.971679	0.853136	0.567173	0.601972	0.245696	0.00184584	0.611054	0.5305	0.806253	ZHD10	zf-HD	↗	↗
MSYJ161460	0.135263	0.128616	0.078318	0.102752	0.0370328	0.346805	0.976667	0.521509	0.0253498	0.144816	0.139312	0.027785	0.677473	0.0758632	0.23586	0.156608	0.320876	0.141317	0.234583	0.090727	0.126694	0.0713191	0.278366	0.207521	0.0284745	5.98598e-05	0.217364	0.00397784	0.0359139	0.130403	0.0276331	0.131367	0.270158	0.947556	0.825452	0.544702	0.595704	0.284784	0.00535372	0.618407	0.558201	0.791089	NAC083	NAC	↗	↗
MSYJ164670	0.129106	0.067738	0.0693643	0.0853847	0.00492321	0.35995	0.951168	0.439287	0.0343406	0.127823	0.163218	0.0235006	0.522777	0.0660247	0.231191	0.114183	0.316933	0.0877401	0.18064	0.081199	0.138946	0.11592	0.275944	0.248195	0.0290095	0.0177272	0.231932	0.00523126	0.00885339	0.0870087	0.0446334	0.106062	0.188844	0.962288	0.855435	0.566213	0.560815	0.166358	0.00421012	0.66052	0.430542	0.778415	TCP3	TCP	↗	↘
MSYJ243890	0.125091	0.0774157	0.0663974	0.0836743	0.00748727	0.351662	0.949732	0.456243	0.029023	0.125669	0.154003	0.0205319	0.545725	0.0632488	0.226328	0.116642	0.311641	0.0925264	0.184725	0.0827173	0.131796	0.107904	0.278439	0.235811	0.0276566	0.0121917	0.223842	0.00242623	0.0116583	0.0943226	0.0378784	0.105535	0.203452	0.953915	0.844281	0.556268	0.560578	0.185215	0.00171129	0.657597	0.447928	0.774414	BAM8	BES1	↗	↘
MSYJ161100	0.119336	0.114388	0.0642382	0.0854059	0.0228909	0.331067	0.9467	0.512928	0.0195426	0.125794	0.131633	0.0185167	0.62203	0.0617062	0.217327	0.131353	0.300769	0.11467	0.204182	0.0937408	0.116083	0.0886767	0.290787	0.202931	0.0302093	0.00188169	0.204649	0.000827328	0.0275727	0.123584	0.0238088	0.110893	0.254868	0.928944	0.811292	0.529097	0.564048	0.250602	0.00110581	0.649811	0.507505	0.764536	WRKY4	WRKY	↗	↘
MSYJ283110	0.114834	0.141322	0.0633624	0.0859824	0.0349022	0.314609	0.933698	0.553639	0.0167568	0.124333	0.118157	0.0198252	0.658736	0.0612618	0.208898	0.138041	0.289879	0.126298	0.211913	0.108536	0.106409	0.0870582	0.308792	0.182586	0.03883	0.00145038	0.191124	0.00482523	0.0420819	0.147664	0.018429	0.112756	0.290919	0.904479	0.783455	0.506698	0.55752	0.289709	0.00540886	0.658111	0.534655	0.749027	MYB102	MYB	↗	↗
MSYJ149390	0.107575	0.131713	0.0566353	0.0775222	0.0268443	0.308645	0.920461	0.545371	0.0142408	0.115264	0.115809	0.015215	0.628114	0.0544538	0.200768	0.125122	0.281231	0.112204	0.196387	0.108526	0.102254	0.0956715	0.313021	0.18243	0.0388241	0.00240166	0.186334	0.00291461	0.0365884	0.14194	0.0171378	0.102647	0.27987	0.897914	0.779395	0.501394	0.542817	0.269178	0.00293452	0.672531	0.507307	0.737705	NAC050	NAC	↗	↗
MSYJ141800	0.0526502	0.174607	0.0194599	0.0330726	0.0277414	0.216309	0.780366	0.642086	0.000531829	0.0585122	0.0627764	0.00161177	0.550667	0.018312	0.123978	0.0707213	0.190622	0.0677133	0.126301	0.175413	0.0505018	0.163875	0.418691	0.118871	0.084197	0.0220222	0.114801	0.0184332	0.0646313	0.201782	0.00258798	0.0508495	0.343716	0.763539	0.652166	0.38924	0.42146	0.277173	0.0155744	0.809724	0.419895	0.604669	MYB108	MYB	↗	↘
MSYJ248690	0.0225093	0.507914	0.0586705	0.0514897	0.216337	0.0138879	0.350143	0.897454	0.110053	0.0297113	0.0135483	0.121919	0.478967	0.0620083	0.00496521	0.06838	0.0120615	0.109194	0.0695241	0.550951	0.0170424	0.502681	0.883295	0.0104691	0.391962	0.236871	0.000205825	0.232724	0.337436	0.575546	0.102457	0.0471545	0.738319	0.32384	0.243428	0.082866	0.122832	0.518318	0.222248	0.716	0.313501	0.217615	NFYC4	NF-YC	↘	↘
MSYJ142710	0.226081	0.0712985	0.147484	0.175991	0.0487756	0.487202	0.861987	0.37517	0.0760125	0.232205	0.242658	0.071624	0.705839	0.143382	0.351461	0.228052	0.451393	0.195396	0.317357	0.0304613	0.223022	0.036997	0.168026	0.33021	0.00171493	0.014563	0.336607	0.0152546	0.0166159	0.0607776	0.0832618	0.208883	0.17248	0.877241	0.996923	0.707862	0.740601	0.237274	0.0189562	0.481073	0.615954	0.955659	TRB1	MYB-related	↗	↗
MSYJ180850	0.208096	0.065072	0.132092	0.158347	0.0374269	0.466143	0.892103	0.379598	0.0669371	0.212587	0.228834	0.0609237	0.669156	0.128058	0.330273	0.205787	0.428319	0.173505	0.291261	0.0349559	0.207884	0.0483772	0.182274	0.317009	0.00288034	0.0127397	0.318689	0.0106214	0.0110725	0.0599912	0.0750478	0.189064	0.168792	0.90145	0.981194	0.68561	0.709919	0.218388	0.0134838	0.509567	0.57983	0.927053	MYB4	MYB	↗	↘
MSYJ005250	0.201378	0.0730207	0.127105	0.153688	0.038239	0.454586	0.901963	0.395798	0.0619597	0.206905	0.219044	0.0573992	0.678038	0.123252	0.321721	0.203101	0.418693	0.17287	0.288638	0.0393898	0.199433	0.0470165	0.189948	0.304656	0.00412048	0.00973763	0.308474	0.00903908	0.0137672	0.0675718	0.0691348	0.184687	0.181233	0.915233	0.966053	0.671936	0.701669	0.229882	0.0119069	0.516215	0.584554	0.915909	ATHB-12	HB-HD-ZIP	↗	↘
MSYJ154110	0.183579	0.0800874	0.113013	0.138647	0.0336666	0.428819	0.931691	0.418773	0.0516493	0.189405	0.199924	0.0479102	0.667734	0.109424	0.299682	0.1877	0.394134	0.160217	0.270976	0.0484938	0.181196	0.0530936	0.208532	0.282687	0.00743107	0.0061329	0.286341	0.00551757	0.0149098	0.0773807	0.0581825	0.168681	0.195127	0.946261	0.934868	0.642651	0.674014	0.233676	0.00789757	0.541522	0.569625	0.885708	ULT1	ULT	↗	↘
MSYJ089610	0.18096	0.067939	0.110031	0.133925	0.0265781	0.429686	0.938601	0.403424	0.0524829	0.184626	0.203275	0.046123	0.63588	0.106279	0.297146	0.177935	0.391626	0.148367	0.258788	0.0467831	0.182251	0.0620849	0.208886	0.289267	0.00737652	0.00910231	0.287663	0.00519128	0.00917724	0.0689135	0.06059	0.162315	0.179327	0.945166	0.938976	0.645064	0.665197	0.209813	0.00706049	0.551361	0.54289	0.881281	WRKY28	WRKY	↗	↘
MSYJ210580	0.174955	0.0532237	0.104572	0.125398	0.0171797	0.426511	0.95702	0.386488	0.0541816	0.175256	0.206359	0.0438808	0.583901	0.100637	0.289884	0.16118	0.383503	0.129063	0.237387	0.0492014	0.181968	0.0807082	0.216401	0.296519	0.0111296	0.0159622	0.286531	0.006851	0.00338059	0.0607094	0.064606	0.150857	0.160141	0.951173	0.93807	0.642828	0.645467	0.175267	0.0077844	0.574533	0.498193	0.86724	ZFWD1	C3H	↗	↘
MSYJ172420	0.151589	0.0578847	0.0863459	0.104526	0.00950999	0.393661	0.996685	0.409591	0.0441317	0.150748	0.185344	0.0331201	0.548291	0.0826747	0.260268	0.136041	0.350061	0.106349	0.20708	0.0642148	0.160614	0.0991176	0.245385	0.273539	0.0194613	0.0168798	0.259576	0.00554534	0.00465178	0.071789	0.054761	0.127368	0.171214	0.993526	0.898094	0.605392	0.602191	0.166493	0.00543201	0.618281	0.460195	0.822751	NLP8	RWP-RK	↗	↘
MSYJ089890	0.108096	0.0720126	0.0550539	0.0657601	9.28475e-05	0.328092	0.887205	0.458417	0.0346146	0.103126	0.151032	0.0202475	0.450794	0.0519078	0.201296	0.0835809	0.281287	0.0582468	0.140266	0.109182	0.124202	0.159033	0.321003	0.235968	0.0511286	0.0340282	0.20941	0.0154397	0.016466	0.102888	0.0467049	0.0812058	0.195688	0.911557	0.812148	0.527805	0.503336	0.140389	0.0125951	0.729193	0.362167	0.721434	MADS1	MADS-MIKC	↗	↘
MSYJ143620	0.102154	0.0747903	0.0522463	0.0600315	0.000596121	0.317276	0.857206	0.465093	0.0395063	0.0949419	0.150539	0.0228808	0.412109	0.0491545	0.190974	0.0714232	0.268032	0.0461045	0.122786	0.12536	0.122034	0.184798	0.3444	0.235984	0.0654372	0.0466879	0.203448	0.0245223	0.0228346	0.111756	0.0527935	0.0725985	0.197985	0.889646	0.79489	0.513573	0.477486	0.125988	0.0207308	0.763934	0.326977	0.696041	GRP-2	CSD	↗	↘
MSYJ143360	0.0464227	0.331046	0.0370418	0.0520839	0.11268	0.139734	0.671105	0.858662	0.0230722	0.0627367	0.0229024	0.0397499	0.670462	0.0380877	0.0892587	0.106637	0.137116	0.127405	0.156296	0.297336	0.0262192	0.224406	0.5621	0.0454569	0.175725	0.0689701	0.0636196	0.0803824	0.170885	0.354561	0.0147587	0.0704569	0.538373	0.614104	0.497827	0.273462	0.360324	0.458806	0.0773917	0.916007	0.503651	0.496319	BZIP23	bZIP	↗	↗
MSYJ035000	0.0385367	0.567081	0.0849627	0.0736724	0.261217	0.00389155	0.29146	0.832804	0.148563	0.044685	0.0297394	0.160568	0.462841	0.0888701	0.00698684	0.0842164	0.00425443	0.130155	0.0752415	0.621358	0.0345396	0.573705	0.961668	0.0187662	0.455823	0.290711	0.00503282	0.284876	0.393943	0.641638	0.140378	0.0649978	0.800329	0.268322	0.196323	0.0551909	0.0897447	0.556256	0.273139	0.640317	0.298131	0.170244	RVE1	MYB-related	↘	↘
MSYJ280900	0.0381827	0.563187	0.0851779	0.0722802	0.259919	0.00394967	0.281751	0.838735	0.152557	0.0426651	0.0337644	0.162655	0.438368	0.089012	0.0055479	0.0786135	0.0020262	0.123439	0.0670362	0.626004	0.0369928	0.586235	0.968394	0.024503	0.461181	0.297494	0.00664461	0.289114	0.394561	0.640986	0.145476	0.0620489	0.793942	0.26473	0.195644	0.0549096	0.0808018	0.542054	0.276902	0.62698	0.277501	0.163312	BHLH137	bHLH	↘	↘
MSYJ255590	0.210374	0.0916361	0.136136	0.165351	0.0517149	0.459352	0.886773	0.415372	0.0649271	0.218965	0.219575	0.0640308	0.726916	0.132481	0.331071	0.222024	0.428223	0.194393	0.311278	0.0425743	0.203184	0.0352062	0.188045	0.30081	0.00604209	0.00851554	0.312277	0.012585	0.024297	0.0803613	0.0699179	0.198834	0.20364	0.911389	0.965845	0.674564	0.720221	0.265703	0.0162755	0.498527	0.627075	0.928029	ARF5	B3-ARF	↗	↗
MSYJ265030	0.192731	0.0626448	0.119312	0.143752	0.0293044	0.446942	0.919108	0.387344	0.0594323	0.196091	0.216225	0.0523939	0.64118	0.115376	0.311748	0.18775	0.407908	0.156245	0.269989	0.0406499	0.194498	0.0585042	0.196524	0.304276	0.00519309	0.0116844	0.30252	0.00755377	0.00815774	0.0619727	0.068046	0.172704	0.169291	0.924407	0.959994	0.664738	0.683223	0.206116	0.00972303	0.534976	0.551534	0.901219	BIM2	bHLH	↗	↘
MSYJ123790	0.184729	0.104085	0.116098	0.144064	0.0463371	0.421302	0.930357	0.451602	0.0501621	0.193987	0.191324	0.0507664	0.715155	0.112856	0.299021	0.200695	0.392353	0.177394	0.286778	0.0569835	0.176501	0.0439823	0.216239	0.26792	0.0116811	0.00354228	0.279692	0.00808193	0.0272989	0.0965086	0.0540274	0.176262	0.226556	0.957738	0.91903	0.630963	0.680203	0.2744	0.0110981	0.535497	0.60796	0.88361	WRKY2	WRKY	↗	↗
MSYJ065270	0.0591208	0.627252	0.111212	0.101859	0.304878	0.00374812	0.282395	0.766775	0.171911	0.0695692	0.0369897	0.189818	0.530317	0.115748	0.0205502	0.120519	0.0128289	0.173427	0.111983	0.663252	0.0475975	0.592082	0.999425	0.0148317	0.491822	0.315976	0.0113143	0.316771	0.439482	0.696472	0.159933	0.0947706	0.86857	0.24294	0.168866	0.0423079	0.0992491	0.632258	0.305632	0.626911	0.355563	0.162099	BCA5	bHLH	↘	↗
Citrus_reticulata_newGene_2941	0.051655	0.607083	0.101643	0.0920191	0.289688	0.00339534	0.287754	0.788235	0.162416	0.0610299	0.0330572	0.178755	0.5128	0.10598	0.0157979	0.108924	0.0100171	0.159702	0.100894	0.647305	0.042041	0.582314	0.985273	0.014361	0.477686	0.305157	0.00832473	0.304286	0.423201	0.677368	0.151477	0.0847704	0.846311	0.252425	0.178305	0.0465061	0.0978563	0.609187	0.293054	0.634845	0.340507	0.166383	SBP1	SBP	↘	↗
MSYJ039720	0.0482107	0.559238	0.0842571	0.0844919	0.253848	0.0282529	0.394107	0.844097	0.118475	0.0639669	0.015653	0.140543	0.616	0.0881343	0.0319124	0.121718	0.0396759	0.169654	0.133399	0.559019	0.028097	0.468976	0.876735	0.000511875	0.396769	0.233229	0.0116434	0.242408	0.36642	0.610445	0.104806	0.0871616	0.799953	0.336143	0.244361	0.091515	0.175934	0.617971	0.234258	0.76689	0.432949	0.252946		C3H	↘	↗
MSYJ120130	0.129015	0.197852	0.081736	0.108583	0.0715844	0.310009	0.93842	0.621178	0.0267868	0.14496	0.113666	0.0381052	0.754403	0.0803153	0.218609	0.174527	0.296531	0.170826	0.252946	0.135664	0.109512	0.0808543	0.331465	0.165588	0.0589701	0.0092592	0.189586	0.0224688	0.0778787	0.194657	0.0233526	0.13921	0.359499	0.885073	0.757225	0.491834	0.576208	0.376572	0.0242863	0.649752	0.614681	0.749524	MIF2	zf-HD	↗	↗
MSYJ026260	0.119349	0.177951	0.0713296	0.0963701	0.0564601	0.305639	0.929777	0.600893	0.0203853	0.132934	0.110736	0.0287831	0.715875	0.0697129	0.209675	0.157009	0.28819	0.150905	0.233211	0.12731	0.103919	0.0843647	0.327023	0.166733	0.0518989	0.00523548	0.184867	0.0147571	0.064406	0.178985	0.018729	0.125329	0.336665	0.885221	0.75988	0.490571	0.562683	0.344518	0.0159972	0.658646	0.580955	0.74232	BZIP16	bZIP	↗	↗
MSYJ135700	0.115301	0.241519	0.076823	0.102871	0.0898923	0.272992	0.887138	0.690347	0.0269345	0.133586	0.0918553	0.0421879	0.770208	0.0761199	0.194364	0.171534	0.265504	0.175427	0.246056	0.174637	0.0917858	0.104602	0.383028	0.133803	0.0864645	0.0211092	0.162049	0.0373938	0.106141	0.240294	0.0207658	0.13249	0.416767	0.824601	0.696342	0.442265	0.538934	0.421127	0.0386931	0.698477	0.619372	0.699068	RR21	GARP-ARR-B	↗	↗
MSYJ193240	0.104661	0.210938	0.0639562	0.0881195	0.0682284	0.272145	0.884737	0.65639	0.0177708	0.119951	0.0900335	0.0291474	0.723618	0.0629221	0.186276	0.150479	0.259238	0.150517	0.223204	0.157752	0.0863283	0.103338	0.369115	0.13818	0.0725797	0.012894	0.159181	0.0245594	0.0849028	0.214225	0.0140187	0.11605	0.381162	0.833441	0.707847	0.447145	0.52823	0.376943	0.0252821	0.70075	0.579606	0.697818	NFYA1	NF-YA	↗	↗
MSYJ111900	0.0928751	0.194027	0.052344	0.074387	0.0539218	0.263588	0.869466	0.641616	0.0112191	0.105781	0.0848793	0.0197644	0.682516	0.0511712	0.174091	0.131088	0.24692	0.129287	0.200863	0.153245	0.078656	0.110421	0.370248	0.136442	0.0682815	0.0102982	0.151354	0.0181799	0.0735348	0.202252	0.00915093	0.100327	0.362384	0.826996	0.704229	0.440563	0.509272	0.346463	0.0182	0.716262	0.542716	0.684354	MYC2	bHLH	↗	↗
MSYJ084990	0.0918086	0.207685	0.0533201	0.0756206	0.0609744	0.256363	0.860424	0.661016	0.012333	0.10577	0.0805079	0.0224043	0.694727	0.0523463	0.17063	0.134161	0.241896	0.134545	0.203643	0.163197	0.0757766	0.114334	0.382079	0.129006	0.0754389	0.0133689	0.146197	0.0227701	0.0823464	0.215353	0.00926455	0.101742	0.379709	0.813923	0.690435	0.429997	0.50422	0.363198	0.0228133	0.724528	0.551371	0.675079	GATA28	C2C2-GATA	↗	↗
MSYJ184680	0.0867627	0.235477	0.0532271	0.0753669	0.0743013	0.237598	0.83402	0.702346	0.0143808	0.102372	0.0699572	0.0270652	0.709929	0.0526774	0.159651	0.136203	0.227058	0.141119	0.203859	0.186582	0.0678919	0.127526	0.411482	0.112307	0.092441	0.0214042	0.132757	0.033076	0.100808	0.24352	0.00953411	0.101189	0.415234	0.781116	0.657109	0.403721	0.486582	0.393317	0.0329312	0.749884	0.559864	0.649062	DOF3.4	C2C2-Dof	↗	↗
MSYJ200170	0.0718297	0.299462	0.051264	0.0713233	0.104436	0.188989	0.757011	0.79909	0.0217608	0.0898221	0.0458692	0.038985	0.721243	0.0516987	0.128818	0.133533	0.185834	0.148637	0.193957	0.248564	0.0488052	0.172256	0.491259	0.074714	0.138971	0.0468133	0.0989631	0.0614779	0.145937	0.311937	0.0136246	0.0947766	0.496323	0.694484	0.57204	0.336245	0.43167	0.452422	0.0603528	0.82729	0.558152	0.575618	S1FA	S1Fa-like	↗	↗
MSYJ129700	0.0570068	0.622966	0.110682	0.0984679	0.303304	0.000844382	0.26174	0.772596	0.178333	0.0647041	0.041988	0.193175	0.48831	0.115138	0.0158529	0.109967	0.0063214	0.161449	0.0966398	0.673591	0.0501191	0.615164	0.984437	0.0221712	0.502564	0.328098	0.0117244	0.324647	0.441969	0.698013	0.1681	0.0885958	0.860957	0.232348	0.16328	0.0380454	0.0806926	0.610053	0.312641	0.60032	0.319443	0.14626	VRN1	B3	↘	↘
MSYJ250660	0.054223	0.610278	0.108233	0.093195	0.296568	0.000908012	0.246835	0.789192	0.182352	0.0587537	0.0477417	0.193467	0.441308	0.112503	0.0120368	0.0969793	0.00174279	0.145917	0.0793637	0.676746	0.0527012	0.633636	0.977563	0.0318893	0.50749	0.336467	0.0136455	0.32817	0.438165	0.691173	0.174316	0.0806186	0.843369	0.229125	0.16502	0.0388964	0.0650761	0.578901	0.315327	0.579973	0.279754	0.135779	MYB6	MYB	↘	↘
MSYJ284800	0.0538688	0.610597	0.107595	0.0930852	0.296203	0.000740816	0.250265	0.788167	0.180451	0.0589122	0.0460739	0.192138	0.448676	0.111882	0.0121704	0.0982092	0.00223237	0.147429	0.0814936	0.674388	0.0514885	0.6289	0.980547	0.0298037	0.504955	0.333583	0.012832	0.326067	0.43712	0.690458	0.17209	0.0810252	0.844462	0.230681	0.165582	0.0390619	0.0679072	0.58256	0.313378	0.584792	0.285919	0.138206	SHH2	HB-other	↘	↘
MSYJ112230	0.0527999	0.564674	0.104013	0.0831733	0.273828	0.0150625	0.234642	0.852999	0.19015	0.0495309	0.0680797	0.19161	0.332587	0.107596	0.0126158	0.0691595	0.00341677	0.109555	0.0438287	0.667403	0.0645203	0.663587	0.983616	0.0648441	0.506474	0.349083	0.0279805	0.32904	0.41787	0.657509	0.187972	0.0651406	0.781872	0.245933	0.192671	0.0598945	0.0454651	0.492944	0.314583	0.555307	0.191212	0.132712	LHY	MYB-related	↘	↘
MSYJ256170	0.0469386	0.576509	0.0979856	0.0808885	0.274952	0.00547525	0.248708	0.830193	0.175869	0.0479911	0.0506867	0.18244	0.390641	0.101845	0.00806179	0.0774221	1.9585e-05	0.12159	0.0579182	0.658346	0.0514038	0.633526	0.994488	0.0421603	0.493543	0.330099	0.0156715	0.316523	0.416161	0.662115	0.170677	0.0664676	0.802492	0.244063	0.183312	0.0500396	0.0581072	0.529771	0.303095	0.580331	0.237852	0.139486	BZIP44	bZIP	↘	↘
MSYJ239490	0.0380832	0.490978	0.0616185	0.0662434	0.20666	0.0497859	0.467306	0.92548	0.0820991	0.0543796	0.00715528	0.103128	0.63072	0.0647471	0.0384281	0.109294	0.0576742	0.15021	0.132144	0.480176	0.0173641	0.392985	0.78592	0.00225361	0.327634	0.178243	0.0160316	0.188486	0.304799	0.534468	0.0696528	0.0735737	0.725064	0.408206	0.308199	0.133593	0.220717	0.571138	0.18177	0.855664	0.449872	0.314864	BHLH104	bHLH	↗	↗
MSYJ013900	0.111891	0.750049	0.183627	0.165068	0.408629	0.00643782	0.1745	0.64837	0.27017	0.118705	0.0940187	0.286454	0.489716	0.189133	0.0455405	0.167407	0.017866	0.22842	0.136938	0.814244	0.105747	0.752089	0.838603	0.058035	0.634248	0.443598	0.044474	0.439031	0.564775	0.833995	0.25816	0.148305	0.989608	0.147016	0.0935943	0.00877149	0.0468923	0.704722	0.425267	0.474652	0.323421	0.0815501		HB-HD-ZIP	↘	↘
MSYJ066250	0.1021	0.732569	0.170249	0.154479	0.391658	0.00440607	0.198857	0.662546	0.24961	0.110872	0.0799572	0.267728	0.515409	0.175663	0.041104	0.162917	0.017314	0.223589	0.138121	0.785308	0.0927898	0.715196	0.870302	0.0448125	0.60587	0.416211	0.036222	0.41458	0.542946	0.811595	0.236694	0.140544	0.974805	0.16441	0.105145	0.0129895	0.0612766	0.703803	0.401611	0.509722	0.344353	0.0990092	BZIP4	bZIP	↘	↗
MSYJ130920	0.100647	0.723574	0.162539	0.153914	0.380861	0.0122075	0.258247	0.669246	0.223916	0.11546	0.0636484	0.248386	0.606912	0.167955	0.0491067	0.179129	0.0319698	0.241317	0.167267	0.742645	0.0812553	0.645784	0.924578	0.0259409	0.564098	0.374319	0.0327713	0.382012	0.520438	0.78853	0.207534	0.147037	0.972173	0.201906	0.129666	0.0288771	0.108536	0.738322	0.371205	0.586875	0.42319	0.14491	NFYA7	NF-YA	↘	↗
MSYJ239550	0.0980485	0.716281	0.166527	0.147348	0.382613	0.00406932	0.180907	0.683342	0.253683	0.102973	0.0863086	0.267262	0.457986	0.171711	0.0359178	0.14645	0.0112954	0.203992	0.116522	0.788252	0.0952634	0.736784	0.862728	0.056071	0.610954	0.425508	0.0380017	0.417982	0.537427	0.802407	0.243447	0.130156	0.952635	0.16066	0.107325	0.0138168	0.0420981	0.665212	0.404	0.485489	0.295754	0.0862769	ERF1B	AP2/ERF-ERF	↘	↘
MSYJ065410	0.0924179	0.709208	0.154218	0.143855	0.369591	0.00717657	0.247488	0.683163	0.219632	0.105186	0.0611256	0.241645	0.57304	0.159499	0.0407936	0.164278	0.023682	0.224718	0.150041	0.73865	0.076544	0.651828	0.924585	0.0264797	0.560733	0.372911	0.0281631	0.377393	0.511243	0.778145	0.204721	0.135347	0.955658	0.198727	0.128956	0.0256681	0.0947071	0.712626	0.366026	0.575378	0.393282	0.135813		MYB-related	↘	↗
MSYJ141090	0.0546954	0.595758	0.1088	0.090371	0.290871	0.00535089	0.23214	0.81116	0.190491	0.0553016	0.0587929	0.19695	0.385743	0.112818	0.0115338	0.0846578	0.000425474	0.130197	0.0619039	0.681426	0.0597997	0.657428	0.969834	0.047976	0.515142	0.349192	0.0202028	0.334955	0.435385	0.683476	0.18521	0.0745432	0.82177	0.228919	0.171151	0.0443012	0.0500611	0.541876	0.321144	0.557271	0.233914	0.126931	BZIP53	bZIP	↘	↘
MSYJ057090	0.116231	0.761378	0.188533	0.170978	0.416651	0.00747979	0.178103	0.635921	0.272926	0.124417	0.0944391	0.290923	0.511193	0.194163	0.0493164	0.176368	0.0212269	0.238876	0.147104	0.819027	0.107728	0.749923	0.835549	0.0560213	0.638005	0.445282	0.04582	0.442835	0.572108	0.843023	0.259869	0.155142	0.997008	0.145506	0.0905842	0.00796361	0.0532124	0.722943	0.429381	0.478785	0.341882	0.0842215	NFYB2	NF-YB	↘	↗
MSYJ177320	0.107483	0.742816	0.173387	0.162216	0.397133	0.0100101	0.231564	0.650224	0.241619	0.120785	0.0735079	0.264837	0.585345	0.178953	0.0502177	0.182295	0.0290178	0.245513	0.165051	0.771614	0.0905182	0.680355	0.891806	0.0341306	0.591419	0.399222	0.0369507	0.404599	0.542002	0.812347	0.225781	0.152741	0.990439	0.180517	0.113365	0.0200233	0.0918487	0.742995	0.393035	0.551156	0.404711	0.124333	MADS2	MADS-MIKC	↘	↗
MSYJ186600	0.117118	0.76483	0.188835	0.172731	0.418081	0.00815288	0.187468	0.6311	0.269777	0.12678	0.0914537	0.289454	0.533308	0.194523	0.0512541	0.181873	0.0239136	0.24531	0.154969	0.814824	0.106125	0.73877	0.841863	0.0515663	0.633317	0.439492	0.0450439	0.439312	0.571695	0.84352	0.255751	0.1583	0.991521	0.149455	0.0919612	0.00898907	0.0619107	0.735633	0.426292	0.49121	0.3607	0.0911545	BEH4	BES1	↘	↗
MSYJ191330	0.136902	0.785986	0.202336	0.196719	0.43321	0.0311438	0.270965	0.611899	0.257343	0.156445	0.0855928	0.28797	0.69212	0.208265	0.0807418	0.231638	0.0599577	0.299681	0.222163	0.782375	0.109177	0.660776	0.895395	0.0373382	0.601467	0.404684	0.0560701	0.419948	0.57049	0.842664	0.2371	0.192463	0.961234	0.196813	0.122122	0.0361965	0.140429	0.821748	0.410213	0.591766	0.500264	0.158773	DPBF3	bZIP	↘	↗
MSYJ264330	0.135695	0.802576	0.210421	0.195425	0.448489	0.014938	0.1865	0.594203	0.289463	0.147716	0.102598	0.312376	0.574793	0.216443	0.0659004	0.208963	0.0356301	0.276071	0.182221	0.842077	0.120519	0.753143	0.81857	0.0563829	0.658324	0.45948	0.0556506	0.463044	0.602394	0.877842	0.273353	0.181884	0.950837	0.139521	0.0814909	0.00799113	0.0731783	0.782047	0.450424	0.485096	0.397709	0.0917224	WRKY75	WRKY	↘	↗
MSYJ039960	0.117365	0.157862	0.0936967	0.0800403	0.0705972	0.282093	0.648734	0.552226	0.137157	0.0947534	0.20102	0.105728	0.174953	0.0912414	0.168402	0.0449068	0.219017	0.0218453	0.054617	0.300619	0.162669	0.423728	0.557794	0.283879	0.230495	0.200163	0.211009	0.154072	0.133961	0.236079	0.157955	0.0711429	0.270464	0.736274	0.680933	0.440339	0.324356	0.0829739	0.143725	0.969139	0.119635	0.531066		C3H	↗	↘
Cluster 4 (the TFs positively associated with most lignin synthesis genes were shown)
Gene ID	GAUT8	GAUT4	GAUT7	RRT1	MUR1	XGD1	ARAD1	CSLC12	CSLC4	XXT1	XXT5	MUR3	XLT2	MUR2	CESA1	CESA2	CESA3	CSLD3	HCT	C3'H	CSE	CCoAOMT1	F5H	4CLL9	PAL1	C4H	4CL2	COMT	CCR1	CAD1	PME1	PG52	XTH23	PME3	PME31	PG49	PL18	PL1	GAL2	ASD1	EXPA1	EXPA8	Gene symbol	TF Family	6-BA(I) vs CK(I)	6-BA(II) vs CK(II)
MSYJ120470	0.306043	0.0480945	0.21358	0.244263	0.0756228	0.597514	0.750514	0.282216	0.130707	0.309414	0.331726	0.121321	0.72916	0.208375	0.446553	0.29356	0.555097	0.249017	0.388924	0.00688924	0.307289	0.0326943	0.106227	0.431569	0.00271472	0.0449397	0.434926	0.0430333	0.0221323	0.0293444	0.141483	0.279395	0.118196	0.754901	0.870191	0.83008	0.848181	0.216694	0.0482715	0.3946	0.662445	0.926694	BLH7	HB-BELL	↗	↘
MSYJ232410	0.318602	0.0479837	0.224361	0.255593	0.081711	0.613419	0.734013	0.272502	0.139371	0.321929	0.344572	0.129715	0.737923	0.219033	0.461052	0.305251	0.570668	0.259426	0.401739	0.00509519	0.31986	0.031856	0.0985905	0.445499	0.0041198	0.0499417	0.449272	0.0482032	0.0250647	0.0275045	0.150376	0.29126	0.114208	0.738154	0.853167	0.847119	0.864947	0.21863	0.0537336	0.381595	0.67373	0.909502	HAT5	HB-HD-ZIP	↗	↘
MSYJ071700	0.273692	0.0521929	0.186228	0.215739	0.0619465	0.555025	0.793968	0.312521	0.108411	0.277612	0.297359	0.100293	0.71234	0.181393	0.408753	0.265007	0.514247	0.224405	0.357694	0.0134799	0.274162	0.0345132	0.128013	0.393484	0.000351147	0.0322077	0.396777	0.0305157	0.0167677	0.0373895	0.118236	0.249706	0.133385	0.800625	0.917108	0.78389	0.804967	0.217397	0.0350615	0.428539	0.637887	0.972263	COL4	C2C2-CO-like	↗	↘
MSYJ208710	0.239889	0.0382079	0.157166	0.182134	0.0395295	0.516225	0.851265	0.317582	0.0918666	0.240328	0.272521	0.0801873	0.637688	0.152423	0.369014	0.221771	0.471008	0.181429	0.306837	0.0215638	0.246407	0.0576054	0.154595	0.370469	0.00261386	0.0295625	0.363912	0.0219701	0.00540082	0.0342631	0.103617	0.21172	0.123329	0.845288	0.956814	0.743176	0.746267	0.177469	0.0248527	0.483485	0.565355	0.973783	BHLH49	bHLH	↗	↘
MSYJ244840	0.263622	0.0872397	0.180438	0.213117	0.0745071	0.529429	0.805297	0.369577	0.0972426	0.272839	0.272172	0.095982	0.777075	0.176228	0.394548	0.273775	0.49763	0.240565	0.369993	0.0261218	0.255138	0.0194588	0.144541	0.358134	0.00381264	0.0222604	0.373511	0.0283151	0.0314437	0.0663966	0.102811	0.250012	0.183189	0.831777	0.955385	0.751392	0.800098	0.276647	0.0335995	0.429089	0.686475	0.989754	TRB1	MYB-related	↗	↗
MSYJ167820	0.253547	0.107606	0.173934	0.20757	0.0802184	0.508678	0.822713	0.405532	0.0900461	0.265219	0.254825	0.0921675	0.802184	0.170116	0.380649	0.273018	0.481425	0.244272	0.369692	0.0374766	0.240922	0.0172953	0.161188	0.33494	0.00880142	0.018465	0.35559	0.0279846	0.0404872	0.0852257	0.0934523	0.245301	0.212661	0.858474	0.985049	0.725684	0.787227	0.306055	0.0333898	0.440733	0.702735	0.990292	TULP3	TUB	↗	↗
MSYJ046030	0.292674	0.0204971	0.201482	0.226389	0.0569176	0.588951	0.787298	0.2521	0.13222	0.289801	0.335201	0.115553	0.631122	0.195955	0.430579	0.260357	0.537384	0.211271	0.346938	0.0113767	0.304547	0.0671388	0.121147	0.442641	0.00916815	0.0566007	0.43036	0.045007	0.0106072	0.0141138	0.147267	0.255998	0.0829348	0.768669	0.874564	0.823146	0.808801	0.15198	0.0484616	0.439548	0.577511	0.95551	WRKY15	WRKY	↗	↘
MSYJ167620	0.469825	0.0606573	0.357732	0.393583	0.16437	0.797114	0.560583	0.173226	0.252861	0.47162	0.50115	0.239239	0.82543	0.351086	0.630812	0.443927	0.750027	0.38395	0.549743	0.00482601	0.472863	0.0464492	0.0329173	0.613452	0.0399081	0.125842	0.61934	0.124493	0.0746895	0.023199	0.266887	0.433691	0.0811094	0.558294	0.666527	0.960735	0.951394	0.245067	0.132901	0.255255	0.79269	0.723742	SPL7	SBP	↗	↘
MSYJ265020	0.446559	0.0658397	0.337274	0.37389	0.154702	0.766806	0.581265	0.198994	0.232198	0.450334	0.472328	0.22127	0.836691	0.330949	0.604987	0.428312	0.722987	0.372085	0.534888	0.00352116	0.446373	0.0343133	0.0403773	0.580545	0.0316658	0.109062	0.590336	0.110294	0.0689133	0.0280085	0.24452	0.414726	0.0965205	0.586415	0.698437	0.992959	0.973231	0.257984	0.11868	0.265302	0.794776	0.748815	SEP1	MADS-MIKC	↗	↗
MSYJ140750	0.459382	0.0770824	0.349339	0.387502	0.166712	0.778729	0.565204	0.20497	0.240259	0.464654	0.481033	0.23103	0.866424	0.343057	0.618748	0.445637	0.737194	0.390099	0.554477	0.00623833	0.456585	0.0300221	0.0371543	0.587449	0.0355105	0.113215	0.601273	0.11692	0.0778432	0.0354415	0.251595	0.429794	0.107386	0.575867	0.689513	0.981976	0.954497	0.278565	0.125865	0.250662	0.82286	0.733532	ARR1	GARP-ARR-B	↗	↗
MSYJ180840	0.294253	0.113968	0.209162	0.245644	0.103048	0.558051	0.766016	0.383743	0.116129	0.307136	0.292742	0.119023	0.849494	0.205054	0.427564	0.315423	0.53181	0.283884	0.417248	0.0319741	0.279378	0.00816703	0.13602	0.374363	0.012376	0.0315636	0.399608	0.0436665	0.0524468	0.0838096	0.119289	0.286126	0.209106	0.805996	0.933676	0.77789	0.845585	0.32634	0.0503186	0.392943	0.754767	0.952534	MYB4	MYB	↗	↗
MSYJ097590	0.21765	0.0149558	0.143149	0.154796	0.0238789	0.488952	0.957137	0.295795	0.110805	0.20562	0.28252	0.0853504	0.438618	0.138119	0.334071	0.161771	0.427428	0.11576	0.224543	0.0660022	0.245254	0.159376	0.225156	0.390675	0.0463646	0.0769509	0.352279	0.0498995	0.0104782	0.038796	0.130357	0.17144	0.0882515	0.905586	0.995017	0.709772	0.648115	0.071763	0.0486276	0.612197	0.390829	0.888569	SPL13A	SBP	↗	↘
MSYJ185570	0.203928	0.0200951	0.129858	0.144154	0.017852	0.471855	0.954165	0.315115	0.0920835	0.195181	0.260087	0.0705715	0.476587	0.125078	0.320883	0.159062	0.414985	0.116375	0.226008	0.0561564	0.22608	0.133355	0.217387	0.364102	0.0319251	0.0562598	0.333297	0.0339721	0.00375274	0.0393292	0.109295	0.163373	0.102291	0.914732	0.989605	0.692814	0.648274	0.0952881	0.0333413	0.597745	0.418642	0.884998	VOZ1	VOZ	↗	↘
MSYJ160550	0.357213	0.0113158	0.257716	0.282371	0.0854085	0.672151	0.719525	0.188739	0.18469	0.350837	0.409883	0.162851	0.628729	0.251396	0.50331	0.310008	0.614298	0.25196	0.397467	0.0101118	0.374671	0.0864172	0.0934041	0.526483	0.0260917	0.0952491	0.508276	0.079529	0.0262474	0.00221254	0.203122	0.311769	0.0485708	0.687585	0.786408	0.911865	0.879072	0.133441	0.08359	0.396912	0.595849	0.878824	ZHD11	zf-HD	↗	↘
MSYJ081650	0.40215	0.0290921	0.296703	0.326719	0.115213	0.723567	0.647929	0.180505	0.208672	0.399737	0.444618	0.190824	0.718161	0.290241	0.555537	0.365433	0.670747	0.30667	0.461877	0.00203451	0.412685	0.0614771	0.0616697	0.559365	0.0259398	0.102044	0.552593	0.0931506	0.0422647	0.00691296	0.224967	0.361276	0.0601987	0.630353	0.734525	0.965476	0.953139	0.181409	0.0992207	0.33005	0.683965	0.810451	DF1	Trihelix	↗	↘
MSYJ181490	0.379305	0.0280696	0.276512	0.306086	0.103057	0.695617	0.672828	0.196859	0.190897	0.377407	0.420206	0.17398	0.709022	0.270264	0.530009	0.345397	0.643858	0.288995	0.440833	0.00155058	0.389091	0.0573801	0.0707927	0.532899	0.0198309	0.089558	0.526503	0.0810373	0.034842	0.00793792	0.206541	0.340221	0.066569	0.65727	0.76294	0.936231	0.926654	0.179988	0.086747	0.347238	0.66939	0.837657	IDD5	C2H2	↗	↘
MSYJ116110	0.434747	0.0360876	0.325748	0.357274	0.135107	0.761656	0.609746	0.165159	0.232385	0.432713	0.476383	0.214565	0.746794	0.319067	0.591899	0.397742	0.709047	0.336732	0.496868	0.00297617	0.444462	0.0620301	0.048301	0.592404	0.0338431	0.117288	0.587774	0.109544	0.0548754	0.0091943	0.248793	0.393272	0.0588301	0.593425	0.697112	0.995284	0.994246	0.194985	0.116376	0.300867	0.717509	0.77043	BHLH48	bHLH	↗	↘
MSYJ249700	0.331054	0.0224518	0.234394	0.261529	0.0764503	0.63696	0.734342	0.225836	0.157417	0.32868	0.372757	0.140675	0.666925	0.228531	0.475071	0.298141	0.585299	0.245671	0.389	0.00507441	0.341897	0.0606851	0.0964527	0.482715	0.0121914	0.0698321	0.473245	0.0597109	0.0199948	0.00966767	0.172723	0.293308	0.074152	0.717298	0.823369	0.874489	0.8626	0.163845	0.0642175	0.396001	0.619472	0.901388	VIP1	bZIP	↗	↘
MSYJ178650	0.294475	0.00254828	0.205834	0.222902	0.053016	0.593102	0.831957	0.221803	0.154841	0.283388	0.358586	0.128743	0.512835	0.199927	0.427263	0.236154	0.530266	0.181377	0.310034	0.0351711	0.320169	0.12991	0.153824	0.47455	0.037145	0.0922933	0.442046	0.0682039	0.0155451	0.0117873	0.175355	0.244915	0.0518088	0.783159	0.874502	0.825561	0.768495	0.0834981	0.069378	0.503268	0.478766	0.986122	NFXL1	NF-X1	↗	↘
MSYJ220070	0.392288	0.0705144	0.289791	0.326229	0.129276	0.697904	0.63899	0.247937	0.18868	0.398481	0.410995	0.181449	0.83143	0.284086	0.543968	0.384775	0.658528	0.335501	0.490096	0.00397639	0.388298	0.0201486	0.0632827	0.512365	0.0174066	0.0774733	0.525886	0.0813837	0.0544412	0.0357662	0.198552	0.366876	0.121275	0.653376	0.770607	0.933958	0.966458	0.267812	0.0891526	0.302762	0.77346	0.81341	MYB14	MYB	↗	↗
MSYJ198980	0.33068	0.117298	0.240705	0.27919	0.122505	0.602867	0.717692	0.360736	0.140707	0.344017	0.328367	0.143548	0.882881	0.236297	0.469389	0.351323	0.576609	0.316744	0.456932	0.0277708	0.314853	0.00377963	0.114735	0.412144	0.0167589	0.0452697	0.43997	0.0587315	0.0626558	0.0812803	0.144088	0.321613	0.202447	0.759125	0.886784	0.8254	0.895329	0.338522	0.0663432	0.353846	0.793924	0.902855		AP2/ERF-ERF	↗	↗
MSYJ209740	0.394314	0.00317121	0.293645	0.312408	0.104107	0.716792	0.722101	0.145013	0.232465	0.380544	0.466533	0.201729	0.547125	0.286743	0.539295	0.32217	0.648543	0.256434	0.400256	0.0352438	0.424011	0.148055	0.111747	0.592396	0.0625188	0.146646	0.557261	0.120291	0.0457507	0.00395149	0.256182	0.336063	0.0190226	0.66287	0.747202	0.955701	0.884336	0.084038	0.122982	0.427594	0.538045	0.865868	ERF118	AP2/ERF-ERF	↗	↘
MSYJ032850	0.536729	0.0355729	0.419938	0.446557	0.191203	0.883351	0.547083	0.081198	0.33246	0.525861	0.602081	0.303251	0.69055	0.412123	0.699199	0.467195	0.81767	0.392373	0.559093	0.034705	0.560745	0.139999	0.0470085	0.732388	0.0919883	0.207316	0.70971	0.187888	0.0994097	0.0132452	0.35587	0.477726	0.0166645	0.497896	0.582404	0.872147	0.928883	0.153162	0.194278	0.28893	0.70008	0.685065	BLH1	HB-BELL	↗	↘
MSYJ220640	0.575547	0.0495779	0.455262	0.483877	0.217992	0.926321	0.504253	0.0706881	0.361243	0.565632	0.638381	0.332762	0.730999	0.447266	0.74165	0.507554	0.861874	0.430946	0.602688	0.0395525	0.597725	0.141614	0.0352813	0.768928	0.104073	0.22655	0.749925	0.209227	0.118039	0.0212031	0.38434	0.516925	0.0221747	0.458461	0.54281	0.829096	0.880993	0.176794	0.216564	0.256449	0.744848	0.640248	PHR1	GARP-G2-like	↗	↘
MSYJ182680	0.422839	0.0356622	0.315113	0.34659	0.128708	0.74718	0.621429	0.173936	0.222568	0.421245	0.463223	0.205422	0.744569	0.308548	0.578772	0.387819	0.69534	0.328122	0.48673	0.00192367	0.431877	0.0583104	0.0519928	0.578044	0.029829	0.109867	0.574038	0.102579	0.0506875	0.00947544	0.238531	0.382544	0.0624801	0.606782	0.711579	0.989686	0.98154	0.195485	0.109277	0.308101	0.712072	0.783643	AP2	AP2/ERF-AP2	↗	↘
MSYJ021640	0.489906	0.0442736	0.3755	0.407922	0.16783	0.82645	0.555075	0.133278	0.277013	0.486799	0.534629	0.257282	0.770251	0.368374	0.652274	0.447013	0.771859	0.381062	0.547974	0.00970213	0.501118	0.0762039	0.0328651	0.654538	0.0531096	0.150456	0.649292	0.142041	0.0772385	0.0127301	0.294747	0.444747	0.0502409	0.534582	0.634408	0.928967	0.945196	0.203662	0.149674	0.265317	0.753274	0.709722		C3H	↗	↘
MSYJ031430	0.643354	0.0878541	0.517276	0.551964	0.270879	0.99721	0.41987	0.0724908	0.406173	0.638238	0.693247	0.382736	0.845848	0.50919	0.816071	0.588393	0.939652	0.51161	0.692957	0.0467422	0.657019	0.127727	0.0114206	0.819851	0.121228	0.251688	0.814837	0.24278	0.154772	0.0436732	0.426477	0.590761	0.0514869	0.391605	0.480504	0.759481	0.786617	0.24929	0.252507	0.184223	0.859375	0.55673		MYB-related	↗	↘
MSYJ246310	0.377605	0.125161	0.282037	0.322893	0.149749	0.658838	0.659621	0.335788	0.173763	0.391541	0.37406	0.176645	0.925363	0.277287	0.522365	0.397849	0.632807	0.359791	0.50778	0.0263316	0.360515	0.00172821	0.0920939	0.460005	0.0257357	0.065352	0.491105	0.0805647	0.0788059	0.0819812	0.177329	0.367594	0.197999	0.703026	0.83032	0.883756	0.956645	0.356859	0.0893387	0.308221	0.843531	0.84256	ABF3	bZIP	↗	↗
MSYJ094760	0.191924	0.0237276	0.123116	0.132599	0.0169937	0.451738	0.994928	0.326584	0.0981162	0.179524	0.256975	0.0729397	0.411983	0.118437	0.30161	0.137003	0.390885	0.0944633	0.195199	0.081862	0.220243	0.174629	0.25574	0.361778	0.0541588	0.0753753	0.321156	0.0472192	0.0128341	0.053118	0.117264	0.147078	0.105706	0.95246	0.959331	0.667192	0.603722	0.0707501	0.0450084	0.655606	0.359358	0.841357	DIVARICATA	MYB	↗	↘
MSYJ020840	0.229119	0.0140667	0.155017	0.164118	0.0310858	0.501459	0.964624	0.284039	0.128205	0.214237	0.301385	0.0994283	0.404557	0.149818	0.344086	0.163936	0.436133	0.115515	0.222458	0.0786797	0.261449	0.185768	0.237068	0.412501	0.062274	0.0972628	0.367403	0.066043	0.0192512	0.0423916	0.149694	0.178267	0.0803104	0.902597	0.986255	0.721019	0.644502	0.0537933	0.0641245	0.63013	0.365224	0.887252		C3H	↗	↘
MSYJ016670	0.622237	0.0641024	0.498933	0.527757	0.250398	0.977339	0.467686	0.0536085	0.402325	0.611346	0.687506	0.372354	0.74826	0.490655	0.790718	0.549558	0.911622	0.469658	0.644881	0.0542308	0.645767	0.162247	0.033074	0.820117	0.128002	0.260354	0.800232	0.242312	0.143581	0.0328293	0.426395	0.560927	0.0235697	0.418216	0.498386	0.779184	0.836293	0.18909	0.250139	0.237515	0.772081	0.597356	ERDJ3B	MYB	↗	↘
MSYJ269070	0.573214	0.106051	0.453152	0.494192	0.240418	0.907839	0.453373	0.156064	0.331591	0.577891	0.596592	0.320497	0.936653	0.44613	0.742214	0.552988	0.864982	0.489373	0.666769	0.0250577	0.570748	0.0558075	0.0102963	0.707952	0.0779368	0.180759	0.724295	0.185497	0.130351	0.0526809	0.344374	0.539138	0.105521	0.461489	0.569156	0.851971	0.827936	0.316126	0.196366	0.176058	0.914038	0.610784	FRS11	FAR1	↗	↗
MSYJ237030	0.618419	0.135504	0.496054	0.539791	0.27885	0.952284	0.410255	0.16176	0.36664	0.62529	0.635525	0.357921	0.997312	0.489004	0.78959	0.604119	0.913043	0.540454	0.721615	0.0397519	0.611947	0.0606736	0.00689973	0.744254	0.0986254	0.206108	0.767288	0.214885	0.160599	0.0742576	0.378072	0.587222	0.128383	0.426447	0.534744	0.810492	0.775161	0.36041	0.226928	0.144341	0.976352	0.565664		GeBP	↗	↗
MSYJ191510	0.590878	0.0459945	0.473359	0.494873	0.228804	0.941236	0.540579	0.0495334	0.395718	0.573658	0.672528	0.358937	0.633502	0.465049	0.751393	0.499779	0.867269	0.418239	0.582908	0.0726787	0.625235	0.209149	0.0727349	0.809717	0.142161	0.272267	0.772991	0.244011	0.136137	0.0309827	0.423586	0.520972	0.00458725	0.468028	0.537949	0.818284	0.908199	0.127242	0.249381	0.315515	0.666409	0.661647	FRS3	FAR1	↗	↘
Citrus_reticulata_newGene_3806	0.601725	0.0498321	0.482953	0.5054	0.235988	0.953569	0.525705	0.0467199	0.402554	0.585107	0.681824	0.366341	0.649879	0.474597	0.763684	0.512064	0.880354	0.430153	0.596757	0.072125	0.635003	0.206168	0.0669632	0.818872	0.143623	0.275635	0.784026	0.248487	0.140467	0.0323842	0.430133	0.532393	0.00644625	0.455328	0.525884	0.805601	0.892415	0.136088	0.254235	0.302634	0.683269	0.646906	HSFB3	HSF	↗	↘
MSYJ047100	0.389472	0.00299791	0.292001	0.306935	0.104124	0.707942	0.755769	0.146303	0.240538	0.372421	0.469913	0.206316	0.494269	0.285088	0.529737	0.307726	0.635766	0.241117	0.379077	0.0535278	0.42469	0.180969	0.137808	0.59755	0.0798057	0.163679	0.553931	0.132185	0.0523691	0.0116392	0.266175	0.326835	0.0163336	0.684618	0.762513	0.943503	0.855111	0.060649	0.133677	0.468538	0.491377	0.893206	BZIP4	bZIP	↗	↘
MSYJ159400	0.491646	0.0193826	0.38448	0.400887	0.165564	0.827272	0.656803	0.0887808	0.32405	0.472507	0.578003	0.286211	0.535964	0.376757	0.641139	0.398774	0.751382	0.323119	0.473133	0.0679139	0.529802	0.2095	0.111594	0.712704	0.117207	0.226556	0.667661	0.193658	0.0950717	0.0197721	0.35217	0.42213	0.00170882	0.577579	0.647997	0.934811	0.965612	0.0769098	0.196574	0.40546	0.555994	0.782684		NF-YC	↗	↘
MSYJ020510	0.47096	0.0198345	0.369281	0.381207	0.15815	0.798171	0.711339	0.103003	0.321165	0.448659	0.564994	0.280265	0.472912	0.36171	0.613243	0.369806	0.718884	0.294979	0.436055	0.0886661	0.514512	0.243343	0.147497	0.699976	0.132835	0.237249	0.646075	0.199097	0.0982488	0.0301832	0.350865	0.398056	0.00468673	0.620743	0.685151	0.968783	0.915291	0.0518607	0.200455	0.462773	0.495772	0.831821	DOF5.3	C2C2-Dof	↗	↘
MSYJ139310	0.604016	0.0509737	0.484608	0.507854	0.237281	0.956494	0.518243	0.0469304	0.402165	0.588091	0.682348	0.366694	0.661745	0.476256	0.766885	0.51638	0.884152	0.43466	0.602433	0.0693311	0.63612	0.20027	0.0621895	0.818943	0.141161	0.273309	0.785911	0.247261	0.140306	0.0318144	0.429331	0.535623	0.00790057	0.450386	0.522165	0.802194	0.88542	0.142042	0.253268	0.294167	0.693989	0.640559		C3H	↗	↘
MSYJ281120	0.666333	0.111217	0.538803	0.577101	0.293657	0.982212	0.387072	0.0880339	0.418628	0.664842	0.706316	0.399346	0.912634	0.530849	0.841055	0.62249	0.965687	0.547716	0.732403	0.0501558	0.673725	0.114016	0.00333905	0.828537	0.126026	0.255921	0.833054	0.252877	0.171235	0.0585196	0.436509	0.619314	0.0757997	0.372166	0.465525	0.740724	0.74906	0.2949	0.263847	0.152031	0.92091	0.526767	ERF114	AP2/ERF-ERF	↗	↘
MSYJ035800	0.752526	0.160155	0.620801	0.662378	0.3641	0.895684	0.313726	0.0880506	0.489864	0.753118	0.786183	0.472635	0.998245	0.612668	0.930682	0.713182	0.943933	0.636586	0.827317	0.0813436	0.755826	0.136633	0.00191202	0.90597	0.170071	0.311356	0.918119	0.312825	0.22783	0.0961931	0.506625	0.70754	0.108541	0.306474	0.397588	0.659529	0.657256	0.359864	0.325496	0.104734	0.98521	0.446409	MYBC1	GARP-G2-like	↗	↘
MSYJ162480	0.728375	0.18225	0.599677	0.645553	0.361181	0.931902	0.320776	0.139422	0.460759	0.735155	0.745067	0.451259	0.931483	0.592157	0.904612	0.710511	0.970612	0.641507	0.83066	0.0766045	0.721343	0.100432	0.00315802	0.855113	0.15487	0.281731	0.881334	0.292136	0.226089	0.110812	0.472824	0.694822	0.148774	0.336518	0.438082	0.699142	0.664586	0.413366	0.305784	0.0926872	0.934717	0.463946		C3H	↗	↗
MSYJ129740	0.698846	0.206706	0.574874	0.62399	0.35754	0.976605	0.342824	0.197578	0.431027	0.711218	0.699898	0.428764	0.87469	0.568036	0.870987	0.701133	0.993761	0.640301	0.825257	0.0785896	0.682501	0.0731439	0.0152063	0.799755	0.144644	0.25516	0.838256	0.273465	0.226537	0.130152	0.438613	0.676316	0.192635	0.379452	0.490124	0.748993	0.685231	0.463489	0.287711	0.0961445	0.897631	0.495211	VRN1	B3	↗	↗
MSYJ261070	0.870043	0.222878	0.734067	0.777151	0.459902	0.778226	0.233312	0.0809088	0.595552	0.870556	0.902628	0.577846	0.928042	0.72559	0.94965	0.827786	0.825061	0.747034	0.942717	0.135117	0.872668	0.192327	0.0152259	0.978326	0.242269	0.401045	0.963045	0.404202	0.308619	0.14948	0.61266	0.823447	0.145054	0.22581	0.308459	0.550748	0.549186	0.425677	0.418314	0.0668344	0.893586	0.351137	ARF6	B3-ARF	↗	↗
MSYJ258330	0.820847	0.233001	0.688596	0.73626	0.436946	0.83963	0.253937	0.136042	0.542301	0.828192	0.835049	0.533143	0.864353	0.680832	0.999183	0.802669	0.876369	0.730819	0.924423	0.117109	0.81223	0.13948	0.0110886	0.94387	0.209584	0.349653	0.974103	0.362341	0.289336	0.152928	0.554222	0.787005	0.179867	0.271784	0.367793	0.613561	0.576304	0.470423	0.3773	0.0578884	0.854961	0.386478	MYB44	MYB	↗	↗
MSYJ119850	0.341124	0.026925	0.262001	0.26363	0.101779	0.627486	0.921396	0.208668	0.247479	0.315412	0.44167	0.205322	0.323046	0.255707	0.457101	0.237707	0.547289	0.175279	0.283941	0.134864	0.391004	0.296702	0.262002	0.566968	0.14512	0.212113	0.498862	0.166241	0.0822768	0.0643074	0.277006	0.270364	0.0480978	0.819338	0.878312	0.843485	0.71032	0.00972926	0.163169	0.647823	0.327742	0.959589	NAC100	NAC	↗	↘
MSYJ123260	0.529542	0.0395013	0.42605	0.43575	0.201344	0.859602	0.685397	0.0820279	0.38089	0.503839	0.632063	0.335791	0.461566	0.418106	0.671782	0.416052	0.776147	0.336384	0.47812	0.120499	0.578435	0.292415	0.162158	0.770816	0.176145	0.293299	0.710273	0.250885	0.13676	0.05115	0.413096	0.450303	0.00547169	0.582276	0.636954	0.911149	0.955076	0.0534666	0.252104	0.464917	0.501544	0.793363	ARF19	B3-ARF	↗	↘
MSYJ119970	0.516131	0.130426	0.443261	0.431465	0.260979	0.785699	0.927939	0.202259	0.456573	0.476646	0.649086	0.399135	0.225656	0.436353	0.616059	0.367959	0.691523	0.295006	0.387495	0.300261	0.587849	0.526115	0.392564	0.780516	0.336954	0.431916	0.682335	0.367483	0.244007	0.184835	0.494655	0.424466	0.0976246	0.775907	0.794046	0.973345	0.7682	0.0218103	0.361816	0.755228	0.285819	0.995953	CDF2	C2C2-Dof	↗	↘
